# Supplementary material
Source: PubMed Central journal article supplement (PMC4135847)

1 **Supplementary Methods**

- 2 **Supp. Fig. 1 - Growth curves of drug-treated cultures for RNAseq analysis.** Newman cultures were treated with the indicated  
3 concentration of drug and OD<sub>600</sub> monitored every 20 min.

4 **Supp. Table 1: GraSR regulated genes.** The maximal upregulation at any time point for each given condition is reported. Genes  
5 with maximal regulation >3 fold are highlighted in bold red font. Fold changes with significance  $p < 0.05$  are marked with asterisks  
6 (\*) by Z-factor test and crosses (+) by T-test. Genes are arranged by decreasing maximal upregulation in any of the conditions.

| GraSR upregulated       |                                                                           | Control                     | PMX30063      |               |                | Daptomycin    |               |                | LL16           |                |                |
|-------------------------|---------------------------------------------------------------------------|-----------------------------|---------------|---------------|----------------|---------------|---------------|----------------|----------------|----------------|----------------|
| Gene                    | Gene description                                                          | [ $\mu\text{g}/\text{mL}$ ] | 0.39          | 0.78          | 1.17           | 2.0           | 4.0           | 6.0            | 2.0            | 4.0            | 6.0            |
| vraG                    | ABC-type transport system permease component                              | 1.26 **                     | 1.60 **       | 2.34 **       | <b>3.18 **</b> | 1.82 **       | 1.48 **       | 1.40 **        | <b>5.48 **</b> | <b>8.36 **</b> | <b>7.68 **</b> |
| TarM                    | hypothetical protein                                                      | 1.30 **                     | <b>3.29 *</b> | 1.70 **       | 1.68 **        | 2.46 *        | <b>3.39 *</b> | 1.97 *         | <b>3.28 *</b>  | <b>4.58 *</b>  | <b>6.79 *</b>  |
| fmcC                    | oxacillin resistance-related FmcC protein                                 | 1.32 **                     | 1.36 **       | 2.24 **       | 2.73 **        | 1.19 *        | 1.36 **       | 1.36 *         | <b>3.80 *</b>  | <b>5.00 **</b> | <b>5.84 **</b> |
| dltC                    | D-alanyl carrier protein                                                  | 1.25 **                     | 1.82 **       | 2.06 **       | 2.25 **        | 1.50 **       | 1.81 *        | 1.30 **        | <b>3.92 **</b> | <b>4.95 **</b> | <b>3.33 **</b> |
| dltA                    | D-alanine-D-alanyl carrier protein ligase                                 | 1.17 **                     | 1.49 *        | 1.96 **       | 2.11 **        | 1.76 **       | 1.77 **       | 1.63 **        | <b>3.82 **</b> | <b>4.37 **</b> | <b>4.79 **</b> |
| dltB                    | D-alanine lipoteichoic acid and wall teichoic acid esterification protein | 1.20 **                     | 1.26 *        | 2.49 **       | 2.61 **        | 1.51 **       | 2.13 *        | 1.33 **        | <b>4.32 **</b> | <b>4.47 **</b> | <b>4.35 **</b> |
| vraF                    | ABC transporter ATP-binding protein VraF                                  | 1.27 *                      | 1.21 *        | 2.23 **       | 1.80 **        | 1.54 *        | 1.59 *        | 1.30 *         | 2.81 *         | <b>4.14 **</b> | <b>3.61 **</b> |
| dltD                    | D-alanine-activating DltD protein                                         | 1.33 **                     | 1.60 *        | 1.75 **       | 2.05 **        | 2.20 **       | 1.80 *        | 1.61 *         | <b>3.52 **</b> | <b>3.64 **</b> | <b>3.50 **</b> |
| rplE                    | 50S ribosomal protein L5                                                  | 1.32 *                      | 1.20 *        | 2.36 *        | 2.89 *         | <b>3.50 *</b> | 2.60 *        | 2.45 *         | 2.67 **        | 2.58 **        | 2.05 **        |
| dltX                    | hypothetical protein                                                      | 1.39 *                      | 1.06 *        | 1.73 *        | 1.74 **        | 1.66 *        | 2.04 *        | 1.38 *         | 3.00 *         | 2.89 **        | <b>3.48 **</b> |
| sdrH                    | SdrH protein                                                              | 1.13 **                     | 1.71 *        | 1.80 *        | 1.85 *         | 1.19 **       | 1.45 *        | 1.29 **        | 1.40 **        | <b>3.08 *</b>  | 1.82 **        |
| NWMN_0632               | hypothetical protein                                                      | 1.43 *                      | 2.07 *        | 2.83 *        | 2.35 **        | 2.86 *        | 2.24 *        | 1.23 *         | 1.57 **        | 2.10 **        | 1.90 **        |
| <b>GraSR identified</b> |                                                                           |                             |               |               |                |               |               |                |                |                |                |
| NWMN_1604               | universal stress protein family protein                                   | 1.40 **                     | 1.28 **       | <b>3.88 *</b> | <b>11.39 *</b> | <b>3.59 *</b> | <b>5.20 *</b> | <b>5.79 **</b> | 2.41 **        | 2.61 **        | <b>3.84 **</b> |
| NWMN_0027               | hypothetical protein                                                      | 1.32                        | 1.61          | <b>3.43 *</b> | <b>5.67 *</b>  | 1.52          | 2.57 *        | <b>4.04 **</b> | 2.73 **        | 2.97 *         | 2.59 *         |
| NWMN_1443               | similar to ComG operon competence protein                                 | 2.09 †                      | 1.7 †         | 0.64 **       | 0.92 †         | 0.51 **       | 1.52 †        | 2.19 †         | 0.95 †         | <b>5.17 *</b>  | 0.55 **        |
| NWMN_1678               | oxidoreductase                                                            | 1.42 *                      | 1.15          | 2.34 **       | <b>3.84 **</b> | 1.28 *        | 1.76 *        | 1.65 *         | 1.35 **        | 1.56 *         | 2.87 *         |
| NWMN_2408               | hypothetical protein                                                      | 1.64                        | 1.58          | 1.77 *        | <b>3.01 *</b>  | 1.41          | 1.78 *        | 1.95 *         | <b>3.51 *</b>  | <b>3.40 *</b>  | 2.76 *         |
| NWMN_1989               | hypothetical protein                                                      | 1.51 **                     | 1.31 **       | 2.70 *        | 2.68 **        | 2.57 **       | <b>3.48 *</b> | <b>3.17 **</b> | 2.96 **        | 2.92 **        | 1.9 **         |
| spsB                    | signal peptidase IB                                                       | 1.54 *                      | 1.83 *        | 1.94 **       | <b>3.21 **</b> | 1.46 **       | 2.01 **       | 2.95 *         | 1.76 *         | 1.88 **        | 2.18 **        |

|           |                                   |         |        |         |         |         |        |        |         |         |         |
|-----------|-----------------------------------|---------|--------|---------|---------|---------|--------|--------|---------|---------|---------|
| NWMN_0904 | hypothetical protein              | 1.33    | 2.17 * | 1.93 *  | 2.85 *  | 2.52 ** | 1.83 * | 1.35   | 1.62 *  | 2.82 *  | 1.84 *  |
| rimP      | hypothetical protein              | 1.23 ** | 1.42 * | 2.34 ** | 2.28 ** | 2.52 ** | 2.28 * | 2.60 * | 2.78 ** | 2.59 ** | 2.05 ** |
| uvrB      | excinuclease ABC subunit B        | 1.16 ** | 1.42 * | 1.81 ** | 2.11 ** | 1.19 ** | 1.62 * | 1.40 * | 1.74 ** | 1.76 ** | 1.44 ** |
| pnBA      | para-nitrobenzyl esterase chain A | 1.29 *  | 1.48 * | 1.97 *  | 1.85 *  | 1.1     | 1.28 * | 1.59 * | 1.73 ** | 2.08 ** | 1.70 ** |

#### GraSR identified, NsaSR upregulated

|            |                              |      |        |        |        |        |         |        |      |        |        |
|------------|------------------------------|------|--------|--------|--------|--------|---------|--------|------|--------|--------|
| oppF       | oligopeptide ABC transporter | 1.66 | 2.25 * | 4.12 * | 9.07 * | 3.84 * | 3.51 ** | 5.95 * | 0.85 | 1.70   | 3.39 * |
| ald (ald1) | alanine dehydrogenase 1      | 1.69 | 2.80 * | 2.39 * | 2.83 * | 0.84 † | 0.97 †  | 1.06 † | 1.85 | 2.24 * | 1.75   |

#### GraSR upregulated, WalKR regulon

|           |                                    |        |        |         |        |        |        |        |         |         |         |
|-----------|------------------------------------|--------|--------|---------|--------|--------|--------|--------|---------|---------|---------|
| NWMN_2203 | secretory antigen precursor SsaA   | 1.32 * | 1.50 * | 2.12 *  | 3.72 * | 3.14 * | 2.02 * | 2.48 * | 2.18 ** | 5.53 ** | 2.96 ** |
| NWMN_2199 | secretory antigen precursor SsaA   | 1.52 * | 1.46   | 1.19    | 2.39 * | 2.32 * | 1.67 * | 1.70 * | 1.39    | 1.73 *  | 1.23    |
| qoxD      | quinol oxidase polypeptide IV      | 1.32 * | 1.39 * | 1.93 ** | 1.90 * | 1.48 * | 2.09 * | 1.35 * | 1.99 ** | 2.25 ** | 1.91 *  |
| qoxA      | quinol oxidase polypeptide II QoxA | 1.27 * | 1.30 * | 1.70 *  | 1.31 * | 1.21 * | 1.38 * | 1.24 * | 1.97 *  | 1.85 *  | 1.37 *  |
| qoxC      | quinol oxidase polypeptide III     | 1.43 * | 1.66 * | 1.66 *  | 1.55 * | 1.28 * | 1.68 * | 1.18   | 1.45 ** | 1.81 *  | 1.44 *  |
| qoxB      | quinol oxidase polypeptide I       | 1.34 * | 1.53 * | 1.67 *  | 1.49 * | 1.13 * | 1.26 * | 1.16 * | 1.66 ** | 1.52 *  | 1.53 *  |

8 **Supp. Table 2: NsaSR regulated genes.** The maximal upregulation at any time point for each given condition is reported. Genes with  
9 maximal regulation >3 fold are highlighted in bold red font. Fold changes with significance  $p < 0.05$  are marked with asterisks (\*) by  
10 Z-factor test and crosses (+) by T-test. Genes are arranged by decreasing maximal upregulation in any of the conditions.

| NsaSR upregulated |                                                 | Control              | Brilacidin     |                |                 | Daptomycin     |                 |                 | LL16           |                |                 |
|-------------------|-------------------------------------------------|----------------------|----------------|----------------|-----------------|----------------|-----------------|-----------------|----------------|----------------|-----------------|
| Gene              | Gene description                                | [ $\mu\text{g/mL}$ ] | 0.39           | 0.78           | 1.17            | 2.0            | 4.0             | 6.0             | 2.0            | 4.0            | 6.0             |
| lysC              | aspartokinase II                                | 1.30 **              | 2.23 **        | <b>7.84 *</b>  | <b>30.62 *</b>  | 1.82 **        | 1.85 **         | 2.68 **         | 1.77 **        | <b>9.53 *</b>  | <b>37.37 *</b>  |
| vraE              | ABC transporter permease                        | 1.19 **              | <b>3.09 **</b> | 2.38 **        | <b>3.64 **</b>  | 2.24 **        | 1.19 **         | 1.72 **         | <b>7.89 +</b>  | <b>24.9 **</b> | <b>35.34 +</b>  |
| thrC              | threonine synthase                              | 1.29 **              | 2.16 **        | <b>4.34 **</b> | <b>24.18 *</b>  | <b>6.13 **</b> | <b>12.15 **</b> | <b>13.66 **</b> | 2.06 **        | <b>3.67 **</b> | <b>14.22 **</b> |
| metL              | homoserine dehydrogenase                        | 1.18 **              | 1.40 **        | <b>7.02 **</b> | <b>24.17 *</b>  | <b>7.35 **</b> | <b>15.51 **</b> | <b>16.64 **</b> | 2.07 **        | <b>3.91 **</b> | <b>16.46 **</b> |
| asd               | aspartate-semialdehyde dehydrogenase            | 1.31 **              | 1.89 **        | <b>4.05 **</b> | <b>23.41 *</b>  | <b>3.03 **</b> | <b>4.96 **</b>  | <b>4.72 **</b>  | 2.10 **        | <b>4.10 **</b> | <b>16.12 **</b> |
| vraD              | ABC transporter ATP-binding protein             | 1.20 **              | 1.16 **        | 1.53 **        | 1.59 **         | 1.31 **        | 1.19 **         | 1.94 **         | <b>4.24 **</b> | <b>11.75 *</b> | <b>22.27 **</b> |
| NWMN_2581         | cobalt transport family protein                 | 1.46 **              | 2.99 **        | <b>8.04 *</b>  | <b>15.30 *</b>  | <b>3.48 *</b>  | <b>5.22 **</b>  | <b>5.21 **</b>  | 2.11 **        | <b>3.29 *</b>  | <b>3.69 **</b>  |
| oppD              | oligopeptide transport ATP-binding protein      | 1.59 *               | 1.54 *         | <b>3.79 *</b>  | <b>14.14 *</b>  | <b>3.65 **</b> | <b>6.68 *</b>   | <b>6.24 **</b>  | 1.45 *         | <b>3.72 *</b>  | <b>3.40 *</b>   |
| gltB              | glutamate synthase large subunit                | 1.09 **              | 1.77 **        | <b>3.65 **</b> | <b>5.19 **</b>  | <b>4.39 **</b> | <b>7.34 **</b>  | <b>8.32 **</b>  | 1.91 **        | <b>4.02 **</b> | <b>12.67 **</b> |
| thrA              | aspartate kinase                                | 1.47 **              | <b>3.99 *</b>  | <b>5.20 *</b>  | <b>10.59 **</b> | <b>3.96 *</b>  | 2.96 **         | <b>6.90 *</b>   | <b>4.62 *</b>  | <b>4.62 **</b> | <b>4.95 **</b>  |
| thrB              | homoserine kinase                               | 1.39 **              | 1.60 **        | <b>5.51 *</b>  | <b>10.09 **</b> | <b>4.84 **</b> | <b>6.15 **</b>  | <b>5.66 **</b>  | 1.97 **        | <b>4.06 **</b> | <b>7.12 **</b>  |
| NWMN_0721         | sigma 54 modulation protein                     | 1.41 *               | 1.25           | <b>4.25 *</b>  | <b>9.56 *</b>   | 2.09 *         | <b>3.61 *</b>   | <b>5.73 *</b>   | 2.10 *         | 1.80 *         | 1.64 *          |
| NWMN_0071         | acetoin reductase                               | 1.37 **              | 1.10 **        | <b>3.07 **</b> | <b>9.37 **</b>  | <b>4.75 **</b> | <b>5.77 **</b>  | <b>8.04 **</b>  | 2.35 **        | 1.45 **        | <b>5.33 **</b>  |
| NWMN_0215         | hypothetical protein                            | 1.2 **               | <b>5.44 *</b>  | 2.71 **        | <b>8.77 **</b>  | <b>3.70 *</b>  | <b>4.2 **</b>   | 1.54 **         | <b>3.57 *</b>  | <b>4.95 *</b>  | <b>3.88 **</b>  |
| oppC              | oligopeptide ABC transporter                    | 1.58                 | 1.32           | 2.71 **        | <b>8.05 *</b>   | 2.84 *         | <b>3.13 **</b>  | 2.99 **         | 1.02           | 1.64           | <b>3.43 *</b>   |
| NWMN_2444         | hypothetical protein                            | 1.38 **              | 1.07 **        | <b>7.73 *</b>  | <b>4.25 *</b>   | 1.78 **        | <b>4.41 *</b>   | 2.18 *          | 1.60 **        | 2.38 *         | 1.86 *          |
| NWMN_0373         | nitroreductase family protein                   | 1.21 **              | 1.25 *         | <b>3.36 *</b>  | <b>7.68 *</b>   | 1.67 **        | 2.77 **         | 2.77 **         | 2.38 *         | 2.60 **        | 2.27 **         |
| NWMN_0535         | similar to haloacid dehalogenase-like hydrolase | 1.98 *               | <b>7.43 *</b>  | <b>3.31 *</b>  | <b>6.56 *</b>   | <b>3.91 *</b>  | <b>4.16 *</b>   | 2.09 **         | 2.81 **        | <b>5.39 *</b>  | <b>6.41 *</b>   |
| NWMN_2109         | truncated MHC class II analog protein           | 1.62 **              | 1.21 *         | 1.30 **        | <b>3.02 **</b>  | <b>3.91 **</b> | <b>4.66 **</b>  | <b>7.34 **</b>  | 1.51 **        | 2.62 *         | 2.66 *          |
| ilvD              | dihydroxy-acid dehydratase                      | 1.56 *               | <b>4.45 *</b>  | <b>3.00 *</b>  | <b>6.91 *</b>   | 2.15 *         | 2.25 **         | <b>4.95 **</b>  | 1.75 **        | 1.37 **        | 2.68 **         |
| NWMN_2224         | alpha-glucoside-specific IIBC component         | 1.45 **              | 1.39 **        | <b>3.44 *</b>  | <b>6.66 **</b>  | 1.11 **        | 1.61 *          | 1.39 **         | 2.02 **        | <b>3.71 **</b> | 2.77 **         |

|           |                                                                |         |                |                |                |                |                |                |                |                |                |
|-----------|----------------------------------------------------------------|---------|----------------|----------------|----------------|----------------|----------------|----------------|----------------|----------------|----------------|
| NWMN_2044 | thiol-disulphide oxidoreductase                                | 1.22 ** | 1.20 **        | <b>3.83 **</b> | <b>4.08 **</b> | <b>3.25 **</b> | 2.63 **        | <b>6.56 **</b> | <b>4.11 *</b>  | <b>3.09 **</b> | 1.65 **        |
| gntP      | gluconate permease                                             | 1.70    | 1.61           | <b>5.38 *</b>  | <b>6.55 *</b>  | 1.31           | 1.86           | 2.19 *         | 2.60 *         | 2.28 *         | <b>3.06 *</b>  |
| NWMN_2473 | hypothetical protein                                           | 1.32 *  | <b>3.96 *</b>  | 2.67 *         | <b>6.38 *</b>  | 2.69 *         | 2.49 **        | <b>3.09 **</b> | 1.67 *         | 1.77 **        | 2.24 *         |
| NWMN_2453 | hypothetical protein                                           | 1.24 ** | 1.38 **        | 1.56 *         | <b>6.11 *</b>  | 1.97 *         | 2.81 *         | 1.94 *         | 2.95 *         | 1.94 *         | <b>3.43 *</b>  |
| malA      | alpha-D-1-4-glucosidase                                        | 1.66    | 1.81           | <b>4.56 *</b>  | <b>6.02 *</b>  | 1.84           | 1.70           | 1.64           | 2.96 *         | 2.92 *         | 2.67 *         |
| NWMN_2043 | similar to non-heme iron-containing ferritin                   | 1.47 ** | 2.43 **        | 1.84 **        | <b>4.16 **</b> | <b>3.38 **</b> | <b>3.51 **</b> | <b>5.91 **</b> | 2.32 **        | 1.69 **        | 1.98 **        |
| leuB      | 3-isopropylmalate dehydrogenase                                | 1.76 ** | 1.69 **        | <b>3.36 **</b> | <b>5.64 **</b> | 2.02 **        | 2.59 **        | <b>3.92 **</b> | 2.84 **        | <b>3.03 **</b> | <b>3.49 **</b> |
| NWMN_0078 | hypothetical protein                                           | 1.42 ** | <b>3.19 **</b> | <b>3.70 **</b> | <b>3.37 **</b> | 2.63 **        | <b>3.77 **</b> | <b>3.32 **</b> | <b>5.45 **</b> | <b>4.25 **</b> | <b>5.20 **</b> |
| ispD      | similar to 4-diphosphocytidyl-2C-methyl-D- erythritol synthase | 1.40    | 1.19           | 1.97 *         | <b>5.40 *</b>  | 2.18 *         | 2.58 **        | 2.72 **        | 1.73 *         | 1.91 *         | 1.92 *         |
| thiM      | hydroxyethylthiazole kinase                                    | 1.35    | 1.80 *         | <b>3.39 *</b>  | <b>5.26 *</b>  | <b>3.24 *</b>  | 1.21           | 1.44           | 1.99 *         | <b>3.97 *</b>  | 2.99 *         |
| fadD      | acyl-CoA dehydrogenase FadD homolog                            | 1.50 *  | 1.95 *         | 2.13 *         | <b>5.22 *</b>  | 1.64 *         | <b>3.10 *</b>  | <b>3.86 *</b>  | 1.63 *         | 2.97 *         | 2.02 *         |
| NWMN_0896 | hypothetical protein                                           | 1.40 ** | 1.57 **        | 1.98 **        | <b>5.16 *</b>  | 1.77 **        | <b>3.19 **</b> | <b>5.15 **</b> | <b>3.21 *</b>  | <b>3.91 **</b> | <b>3.61 **</b> |
| NWMN_0335 | similar to ribosomal protein-serine acetyltransferase          | 1.32    | <b>3.41 *</b>  | 1.12           | <b>3.19 **</b> | <b>3.15 *</b>  | <b>3.78 *</b>  | <b>5.16 *</b>  | 2.69 *         | 2.06 *         | 2.19 *         |
| NWMN_0897 | lipoate-protein ligase A                                       | 1.19 ** | 1.20 **        | 2.26 *         | <b>5.09 *</b>  | 1.53 *         | 2.54 *         | 2.27 **        | 1.88 **        | 1.53 **        | 2.09 *         |
| oppB      | hypothetical protein                                           | 1.71 *  | <b>4.53 *</b>  | 2.87 **        | 2.78 **        | 2.78 **        | 2.68 *         | 1.56 **        | <b>3.92 *</b>  | <b>5.07 *</b>  | 2.44 **        |
| mobB      | molybdopterin-guanine dinucleotide biosynthesis protein B      | 1.50 ** | 1.36 *         | 2.71 *         | <b>5.06 *</b>  | 2.03 **        | <b>3.04 *</b>  | 2.67 **        | <b>3.38 **</b> | 2.71 **        | 2.41 **        |
| hipO      | hippurate hydrolase                                            | 1.35 *  | 1.27 *         | 1.40 *         | <b>4.95 *</b>  | 1.48 *         | 2.05 *         | 2.77 *         | 1.19 *         | 1.17 *         | 2.61 **        |
| NWMN_2579 | hypothetical protein                                           | 1.56 *  | 1.50 **        | 2.37 **        | <b>4.77 **</b> | 1.34 *         | 1.68 **        | 2.62 *         | 1.91 **        | 2.36 **        | 2.31 **        |
| metH      | 5-methyltetrahydrofolate-homocysteine methyltransferase        | 1.22    | 1.22           | <b>4.11 *</b>  | <b>4.76 *</b>  | 0.91           | 1.71 *         | 1.17           | 2.12 *         | 1.52 *         | <b>4.58 *</b>  |
| NWMN_2459 | D-isomer specific 2-hydroxyacid dehydrogenase family protein   | 1.44    | 1.28           | 2.27 *         | <b>4.69 *</b>  | 1.68 *         | 1.78 *         | 1.10           | 1.89 *         | 1.79 *         | 1.67 *         |
| BraD      | ABC transporter ATP-binding protein                            | 1.33 *  | 2.20 *         | 2.10 *         | 1.88 *         | 1.54 *         | 1.27 *         | 1.06           | 2.77 *         | <b>3.82 **</b> | <b>4.66 **</b> |
| NWMN_2470 | hypothetical protein                                           | 1.32 *  | 1.07 *         | 1.65 *         | <b>4.63 *</b>  | 1.74 *         | 1.55 **        | 1.48 **        | 1.15 *         | 2.17 *         | 2.61 **        |
| purL      | phosphoribosylformylglycinamide synthase II                    | 1.31 ** | 2.04 *         | <b>4.49 **</b> | <b>3.65 **</b> | 1.49 **        | <b>3.64 **</b> | <b>4.49 **</b> | <b>3.36 **</b> | 2.40 **        | 2.07 **        |
| NWMN_2589 | hypothetical protein                                           | 1.26 ** | 1.39 *         | 1.94 *         | <b>3.34 *</b>  | 1.57 **        | <b>3.74 **</b> | <b>4.49 **</b> | 1.38 **        | 2.18 *         | 1.53 **        |
| NWMN_1640 | hypothetical protein                                           | 1.55 *  | 1.67 *         | 1.95 **        | <b>4.47 **</b> | 1.52 **        | 2.45 *         | 2.48 *         | <b>3.08 *</b>  | 2.42 **        | 2.19 **        |
| opp1B     | oligopeptide transporter putative membrane permease            | 1.48    | 2.25 *         | 2.30 *         | <b>4.42 *</b>  | <b>3.14 *</b>  | <b>3.23 *</b>  | 1.34           | <b>3.38 *</b>  | <b>3.61 *</b>  | 1.16           |

|           |                                                        |         |               |                |                |               |               |                |                |                |                |
|-----------|--------------------------------------------------------|---------|---------------|----------------|----------------|---------------|---------------|----------------|----------------|----------------|----------------|
| NWMN_1998 | transcriptional regulator TenA family protein          | 1.45 *  | 1.18          | 2.15 *         | <b>3.10 *</b>  | 1.25 *        | 1.76 *        | 1.41 *         | 2.23 *         | 1.67 *         | <b>4.32 *</b>  |
| NWMN_0221 | hypothetical protein                                   | 1.21    | <b>4.30 *</b> | 1.80 *         | 0.97           | 1.81 *        | <b>4.29 *</b> | 2.00 *         | 2.38 *         | 2.04 *         | 2.55 *         |
| fdhD      | formate dehydrogenase family accessory FdhD            | 1.21 ** | 1.39 *        | 2.16 **        | <b>4.24 *</b>  | 2.63 *        | 1.93 **       | 2.26 **        | 2.99 *         | 1.47 *         | 2.39 **        |
| NWMN_2428 | hypothetical protein                                   | 1.36 *  | <b>4.23 *</b> | 2.20 *         | 2.83 *         | <b>3.63 *</b> | 2.60 *        | <b>3.76 **</b> | 1.63 **        | 2.12 *         | 2.77 **        |
| mtIF      | mannitol-specific IIBC component                       | 1.94    | <b>4.20 *</b> | 2.63 *         | 2.20           | 2.73 *        | 2.42 *        | <b>3.46 *</b>  | 2.57 *         | 2.84 *         | 2.01           |
| narI      | respiratory nitrate reductase gamma subunit            | 1.20    | 1.87          | 2.18           | 0.92           | 1.01          | 1.54          | 1.02           | 1.62           | <b>4.20 *</b>  | 2.20           |
| NWMN_1395 | hypothetical protein                                   | 1.71 *  | 1.23 *        | 2.72 *         | <b>3.52 **</b> | 2.58 *        | 1.99 *        | 1.66 **        | <b>4.04 *</b>  | <b>3.66 **</b> | <b>3.06 **</b> |
| purF      | glutamine phosphoribosylpyrophosphate amidotransferase | 1.27 ** | 1.94 *        | <b>3.89 **</b> | 2.48 **        | 2.60 *        | 2.97 *        | <b>3.70 *</b>  | 2.50 *         | 2.03 **        | 2.55 **        |
| thiD      | phosphomethylpyrimidine kinase                         | 1.45 *  | 0.89          | 1.89 *         | <b>3.87 *</b>  | 1.62 **       | 1.19 *        | 1.54 *         | <b>3.23 **</b> | 1.71 *         | 2.11 *         |
| NWMN_2608 | hypothetical protein                                   | 1.24 *  | <b>3.77 *</b> | 1.47 *         | 1.73 **        | 2.58 *        | 0.94          | 1.44 *         | 2.27 *         | 1.97 *         | 1.79 **        |
| srtB      | NPQTN-specific sortase B                               | 1.27 ** | 2.55 *        | 1.69 **        | 2.66 *         | 2.63 *        | 1.78 **       | 2.07 *         | <b>3.76 *</b>  | <b>3.18 **</b> | 2.14 **        |
| ilvE      | branched-chain-amino-acid aminotransferase             | 1.23 ** | 1.56 **       | 2.70 *         | <b>3.75 **</b> | 1.33 *        | 2.16 **       | 2.21 **        | 1.42 **        | 1.75 **        | <b>3.43 *</b>  |
| BraE      | ABC transporter Permease                               | 1.50 *  | 1.15          | 1.89 *         | <b>3.10 **</b> | 1.37 *        | 1.45 *        | 1.44 *         | 2.92 *         | <b>3.72 *</b>  | <b>3.03 **</b> |
| NWMN_1941 | similar to nitroreductase family protein               | 1.35 *  | <b>3.46 *</b> | 1.62 *         | 2.46 *         | 1.73 *        | 1.71 *        | 2.79 *         | 2.70 *         | 2.02 *         | 1.68 *         |
| fmhA      | methicillin resistance determinant fmhA protein        | 1.23 ** | 2.31 *        | <b>3.21 **</b> | 2.37 *         | 2.26 **       | 2.80 **       | <b>3.43 *</b>  | 2.12 **        | 2.18 **        | 2.40 **        |
| NWMN_2491 | hypothetical protein                                   | 1.28 ** | 1.37 *        | 2.09 *         | <b>3.38 **</b> | <b>3.23 *</b> | 1.78 **       | 2.30 **        | 1.51 *         | <b>3.09 **</b> | 1.81 **        |
| NWMN_2472 | hypothetical protein                                   | 1.32    | 1.75 *        | 1.36           | 1.93 *         | 2.44 *        | 1.78 *        | <b>3.37 *</b>  | 1.49 *         | 2.17 *         | 1.18           |
| NWMN_0894 | nucleotidase family protein                            | 1.18 ** | 1.44 *        | 1.49 **        | <b>3.35 **</b> | 1.97 *        | 2.14 **       | 1.78 **        | 2.05 *         | 1.90 **        | 2.27 **        |
| NWMN_0175 | flavoheмоprotein                                       | 1.42    | 1.37          | 2.51 *         | <b>3.25 *</b>  | 0.84 †        | 0.80 †        | 0.77 †         | 2.21 *         | 1.02 †         | 1.11           |
| scdA      | cell wall metabolism protein                           | 1.55 *  | 1.63 *        | 1.51 *         | <b>3.23 *</b>  | 1.68 *        | 1.26          | 1.77 *         | 2.21 *         | 1.70 *         | 2.36 *         |
| NWMN_1773 | N-acetylglucosamidase for bacteriophage phiNM1         | 1.1 **  | 1.56 **       | <b>3.22 *</b>  | 2.57 **        | 1.76 *        | 1.53 *        | 2.23 **        | 1.24 *         | 2.21 **        | 1.65 **        |
| NWMN_2425 | hypothetical protein                                   | 1.68 *  | 2.66 *        | 2.22 *         | 2.07 **        | 2.00 *        | <b>3.09 *</b> | <b>3.14 *</b>  | <b>3.03 *</b>  | 1.57 *         | 2.45 *         |
| nirR      | nitrite reductase transcriptional regulator NirR       | 1.73    | 1.24          | 2.11           | 1.39           | 1.03          | 2.78          | 0.93           | <b>3.10</b>    | 1.26           | 1.54           |
| tagB      | teichoic acid biosynthesis protein B                   | 1.40 *  | 2.20 *        | <b>3.10 *</b>  | 2.75 **        | 1.90 **       | 2.02 **       | 1.79 **        | 1.28 **        | 2.29 *         | 1.92 *         |
| NWMN_2002 | hypothetical protein                                   | 1.25 *  | 1.40 *        | 2.02 *         | <b>3.10 *</b>  | 0.77 **       | 1.87 *        | 1.20 *         | 1.63 *         | 1.86 *         | 1.24 *         |
| arcC      | carbamate kinase                                       | 1.32 *  | 1.47 *        | 2.42 **        | 2.61 **        | 1.93 **       | <b>3.04 *</b> | 1.50 *         | 2.36 **        | 1.83 **        | 2.58 **        |

|            |                                                                                                            |         |         |         |         |         |         |         |         |         |         |
|------------|------------------------------------------------------------------------------------------------------------|---------|---------|---------|---------|---------|---------|---------|---------|---------|---------|
| NWMN_0177  | similar to PTS transport system IIBC component                                                             | 1.32    | 1.58 *  | 2.37 *  | 3.00 ** | 1.65 *  | 1.70 *  | 1.94 *  | 1.54 *  | 1.59 *  | 1.72 *  |
| aroC       | chorismate synthase                                                                                        | 1.15    | 1.74 *  | 2.24 *  | 2.99 *  | 2.22 *  | 2.07 *  | 1.38 *  | 2.71 *  | 1.75 ** | 1.49 ** |
| ldh (ldh2) | L-lactate dehydrogenase 2                                                                                  | 1.24    | 1.49    | 1.98 *  | 2.92 *  | 1.31    | 1.91 *  | 1.97 *  | 2.12 *  | 1.26    | 1.59    |
| NWMN_1226  | hypothetical protein                                                                                       | 1.31 *  | 1.33 *  | 2.17 *  | 1.90 *  | 1.40 *  | 0.90 ** | 1.01 †  | 1.32 *  | 1.06 †  | 2.92 *  |
| NWMN_2379  | hypothetical protein                                                                                       | 1.29 *  | 2.74 *  | 2.90 *  | 1.34 *  | 2.18 *  | 1.60 *  | 1.35 *  | 1.83 *  | 2.25 *  | 2.02 *  |
| ipdC       | indole-3-pyruvate decarboxylase                                                                            | 1.72    | 2.25 *  | 2.89 *  | 2.59 *  | 1.28    | 1.02    | 1.43    | 1.57    | 1.71    | 1.30    |
| opuCA      | glycine betaine FL-proline transport ATP-binding subunit                                                   | 1.27    | 1.31    | 1.65 *  | 2.88 ** | 1.20    | 1.75 *  | 1.63 *  | 1.29    | 1.03    | 1.47 *  |
| mutL       | DNA mismatch repair protein MutL<br>similar to tetracenomycin polyketide synthesis O-<br>methyltransferase | 1.17 ** | 1.62 *  | 2.35 ** | 2.87 ** | 2.16 ** | 2.02 ** | 2.12 ** | 2.20 ** | 2.48 ** | 2.07 ** |
| NWMN_1930  |                                                                                                            | 1.49    | 2.55 *  | 1.70 *  | 1.48    | 1.48    | 2.26 *  | 0.90 †  | 2.86 *  | 1.76 *  | 2.63 *  |
| NWMN_0222  | hypothetical protein                                                                                       | 1.30    | 1.49    | 1.30    | 2.85 *  | 1.50    | 2.57 *  | 1.05 †  | 1.92 *  | 2.80 *  | 1.34    |
| sdrC       | Ser-Asp rich fibrinogen bone sialoprotein-binding protein SdrC                                             | 1.26 ** | 1.31 ** | 1.50 *  | 1.82 ** | 2.01 ** | 2.60 *  | 2.85 *  | 1.87 *  | 2.54 ** | 2.24 ** |
| NWMN_0269  | hypothetical protein                                                                                       | 1.43 *  | 2.84 ** | 1.95 ** | 2.18 ** | 1.60 *  | 2.14 *  | 2.35 *  | 1.70 ** | 2.31 ** | 2.36 *  |
| NWMN_2538  | hypothetical protein                                                                                       | 1.36 *  | 1.65 *  | 2.07 *  | 1.76 *  | 2.48 *  | 2.19 *  | 2.11 *  | 2.81 *  | 2.64 *  | 1.28 *  |
| NWMN_0220  | hypothetical protein                                                                                       | 1.59 *  | 1.57 *  | 1.54 *  | 1.26 *  | 1.72 *  | 2.79 *  | 1.87 *  | 1.89 *  | 1.78 *  | 1.36 *  |
| NWMN_2036  | hypothetical protein                                                                                       | 1.26 ** | 1.51 *  | 1.86 ** | 2.79 ** | 1.92 ** | 2.43 ** | 2.20 ** | 1.80 *  | 1.86 ** | 2.45 ** |
| glcA       | glucose-specific PTS transporter protein IIBC component                                                    | 1.52    | 1.39    | 2.09    | 1.77    | 1.39    | 1.37    | 1.48    | 1.70    | 2.73 *  | 2.59 *  |
| NWMN_2451  | MmpL efflux pump                                                                                           | 1.37 *  | 1.21 *  | 2.04 *  | 2.00 *  | 1.86 ** | 1.82 *  | 1.32 *  | 2.73 *  | 2.32 ** | 1.68 ** |
| treR       | trehalose operon repressor                                                                                 | 1.48 *  | 1.43 *  | 1.48 *  | 1.95 *  | 1.68 *  | 1.14    | 1.15    | 2.70 *  | 2.10 *  | 1.64 *  |
| NWMN_0656  | cobalamin synthesis protein                                                                                | 1.23 ** | 2.28 ** | 2.10 *  | 1.67 ** | 1.66 ** | 2.18 *  | 1.73 *  | 2.23 *  | 2.70 *  | 1.59 ** |
| NWMN_0186  | zinc-containing alcohol dehydrogenase                                                                      | 1.42    | 1.67    | 2.68 *  | 2.35 *  | 1.01    | 1.55    | 1.18    | 1.24    | 1.19    | 1.97    |
| entB       | isochorismatase                                                                                            | 1.37 *  | 1.59 *  | 2.60 *  | 2.40 *  | 0.90    | 0.93    | 1.98 *  | 2.59 *  | 2.61 ** | 1.54 ** |
| isaB       | immunodominant antigen B                                                                                   | 1.39 *  | 1.84 *  | 2.00 *  | 2.33 ** | 2.01 *  | 2.02 *  | 2.55 *  | 2.59 *  | 2.54 ** | 2.44 *  |
| NWMN_2196  | hypothetical protein                                                                                       | 1.46 *  | 1.69 *  | 1.16 *  | 2.59 *  | 1.13 *  | 1.29 *  | 1.23 *  | 1.33 *  | 1.76 *  | 1.49 *  |
| NWMN_2254  | similar to multidrug resistance protein A                                                                  | 1.61 *  | 1.47    | 1.38    | 2.57 *  | 2.48 *  | 1.28    | 0.89 †  | 1.81 *  | 1.40    | 1.66 *  |
| NWMN_2303  | formate nitrite transporter family protein                                                                 | 1.52 *  | 1.66 *  | 1.24 *  | 0.95    | 1.34 *  | 2.54 *  | 1.82 *  | 1.86 *  | 1.91 *  | 1.31 *  |
| NWMN_2421  | NADH-flavin oxidoreductase                                                                                 | 1.28 *  | 1.17    | 1.39 *  | 1.85 *  | 1.74 ** | 2.47 *  | 2.2 **  | 1.89 *  | 1.85 *  | 1.73 *  |

|           |                                                    |         |         |         |         |         |         |         |         |         |         |
|-----------|----------------------------------------------------|---------|---------|---------|---------|---------|---------|---------|---------|---------|---------|
| dnaA      | chromosomal replication initiator protein DnaA     | 1.26 *  | 1.48 *  | 1.76 *  | 2.46 *  | 1.18 *  | 1.84 *  | 1.37 *  | 1.82 *  | 1.84 ** | 1.81 *  |
| NWMN_2239 | aldose 1-epimerase precursor                       | 1.38 *  | 1.76 *  | 1.54 *  | 1.76 ** | 1.68 ** | 2.37 *  | 1.82 *  | 2.45 ** | 2.10 ** | 1.84 ** |
| NWMN_0912 | similar to menaquinone-specific isochorismate      | 1.17 ** | 1.76 *  | 2.35 ** | 2.44 *  | 1.67 *  | 1.53 *  | 1.27 *  | 1.29 ** | 1.80 ** | 1.74 *  |
| NWMN_2607 | hypothetical protein                               | 1.48    | 1.61 *  | 2.39 *  | 1.52    | 1.87 *  | 0.74 ** | 0.92 ** | 1.81 *  | 1.41 †  | 1.37 †  |
| metB      | cystathionine gamma-synthase                       | 1.28 †  | 1.51 *  | 2.38 *  | 1.51 *  | 0.95 ** | 1.03 †  | 1.33 †  | 0.97 ** | 2.01 *  | 1.44 †  |
| NWMN_2186 | acyl-CoA dehydrogenase-related protein             | 1.33 *  | 1.09    | 1.92 *  | 1.60 *  | 1.35 *  | 2.38 *  | 2.22 ** | 1.99 ** | 1.51 *  | 1.57 *  |
| NWMN_0944 | similar to ABC transporter ATP-binding protein     | 1.30 ** | 2.16 ** | 2.37 ** | 1.89 ** | 1.54 ** | 1.91 ** | 1.82 ** | 2.21 ** | 2.01 ** | 1.21 *  |
| NWMN_0800 | haloacid dehalogenase-like family protein          | 1.27 *  | 1.12    | 1.50 *  | 2.34 *  | 0.89 †  | 1.23    | 0.95    | 1.36 *  | 2.17 *  | 2.35 *  |
| NWMN_1888 | tail tape measure protein for bacteriophage phiNM3 | 1.23 *  | 1.39 *  | 2.00 *  | 1.32 *  | 1.36 *  | 1.53 *  | 1.92 ** | 1.29 *  | 2.18 *  | 2.35 *  |
| NWMN_2304 | hypothetical protein                               | 2.04    | 1.17 †  | 1.12 †  | 1.62    | 1.00 †  | 1.03 †  | 1.09 †  | 2.35    | 1.76    | 1.07 †  |
| treC      | C alpha-phosphotrehalase                           | 1.58 *  | 1.93 *  | 1.83 *  | 1.97 *  | 1.59 *  | 1.38 *  | 1.16    | 2.21 *  | 2.33 *  | 2.02 *  |
| NWMN_0561 | hypothetical protein                               | 1.25 *  | 1.32 *  | 2.30 *  | 1.61 *  | 1.00 †  | 1.51 *  | 1.54 *  | 1.41 *  | 2.26 *  | 1.45 *  |
| NWMN_0249 | nucleotidase lipoprotein family protein            | 1.37    | 1.88 *  | 0.79 ** | 0.54 ** | 1.01 †  | 1.23 †  | 1.24 †  | 2.30 *  | 1.25 †  | 0.90 †  |
| NWMN_0777 | hypothetical protein                               | 1.33 *  | 1.70 *  | 1.76 *  | 1.65 *  | 1.47 *  | 1.97 *  | 1.90 *  | 2.30 ** | 1.33 ** | 1.56 *  |
| moeA      | molybdopterin biosynthesis protein MoeA            | 1.49 *  | 1.70 *  | 2.14 *  | 2.29 *  | 1.47 ** | 1.61 *  | 1.74 *  | 1.43 ** | 1.94 ** | 1.91 *  |
| NWMN_0115 | hypothetical protein                               | 1.42    | 1.70    | 1.66    | 1.85 *  | 1.92 *  | 1.05    | 1.00    | 1.74    | 2.28 *  | 1.34    |
| narH      | nitrate reductase beta chain                       | 1.15    | 2.25    | 1.23    | 1.26    | 0.92    | 0.65    | 1.30    | 1.23    | 1.12    | 1.08    |
| NWMN_0256 | hypothetical protein                               | 1.79    | 0.89    | 1.60    | 2.24    | 1.85    | 0.92    | 1.26    | 1.86    | 1.96    | 1.23    |
| mvaS      | 3-hydroxy-3-methylglutaryl coenzyme A synthase     | 1.39 *  | 2.01 *  | 1.43 ** | 2.24 *  | 1.73 ** | 1.67 ** | 1.53 ** | 2.05 ** | 1.97 ** | 1.58 ** |
| NWMN_0943 | similar to cobalt transport protein                | 1.32 *  | 1.51 ** | 2.24 ** | 1.95 *  | 1.19 *  | 1.59 ** | 1.56 ** | 1.42 *  | 1.91 *  | 1.34 *  |
| NWMN_2386 | similar to helicase                                | 1.21 *  | 1.62 *  | 1.25 *  | 1.94 *  | 1.36 *  | 2.13 *  | 1.53 *  | 1.54 ** | 2.21 *  | 1.76 *  |
| NWMN_0223 | hypothetical protein                               | 1.31 *  | 1.35 *  | 1.81 *  | 1.75 *  | 1.21 *  | 2.12 *  | 2.21 *  | 1.74 ** | 1.71 ** | 1.40 *  |
| NWMN_2447 | methylated-DNA-protein-cysteine methyltransferase  | 1.23 *  | 1.39 *  | 1.71 *  | 2.20 *  | 1.17 *  | 1.21 *  | 1.33 *  | 1.38 *  | 1.59 *  | 1.64 *  |
| NWMN_2240 | hypothetical protein                               | 1.29 *  | 1.60 *  | 1.74 *  | 1.42 *  | 1.81 *  | 1.56 *  | 1.48 *  | 2.20 ** | 1.75 ** | 1.25 ** |
| narG      | nitrate reductase alpha subunit                    | 1.27    | 2.04    | 1.28    | 1.29    | 1.61    | 1.30    | 2.18    | 1.44    | 1.47    | 1.05    |
| NWMN_2392 | hypothetical protein                               | 1.37 *  | 1.31 *  | 1.87 *  | 1.60 *  | 1.46 ** | 1.70 *  | 2.00 *  | 2.07 *  | 2.18 ** | 1.94 *  |



|           |                                                                         |        |         |         |         |         |         |         |         |         |         |
|-----------|-------------------------------------------------------------------------|--------|---------|---------|---------|---------|---------|---------|---------|---------|---------|
| NWMN_2241 | hypothetical protein                                                    | 1.16 * | 1.36 *  | 1.81 *  | 2.02 *  | 1.52 *  | 2.08 *  | 1.92 *  | 1.84 *  | 2.17 *  | 1.68 *  |
| NWMN_0114 | cation efflux family protein                                            | 1.26   | 1.51 *  | 1.63 *  | 1.21    | 1.80 *  | 1.45 *  | 1.15    | 1.29    | 2.15 *  | 1.66 *  |
| queC      | 7-cyano-7-carbaguanine synthase                                         | 1.32 * | 1.72 *  | 1.79 *  | 1.51 *  | 1.70 *  | 2.12 *  | 1.38 *  | 1.52 *  | 2.05 *  | 1.31 *  |
| NWMN_1990 | hypothetical protein                                                    | 1.21   | 2.12 *  | 1.56    | 1.51    | 1.35    | 1.10    | 1.29    | 1.35    | 1.67    | 1.15    |
| sbcD      | exonuclease SbcD                                                        | 1.20 * | 2.12 *  | 2.09 ** | 1.77 ** | 1.35 ** | 1.40 *  | 1.17 *  | 1.56 *  | 1.67 ** | 1.52 *  |
| modC      | molybdenum ABC transporter ATP-binding protein                          | 1.39 * | 1.49 *  | 1.19    | 1.47 *  | 1.27    | 1.77 *  | 2.09 *  | 1.44 *  | 1.76 *  | 1.59 *  |
| NWMN_0119 | hypothetical protein                                                    | 1.24   | 1.42    | 2.09 *  | 0.90 †  | 0.99    | 1.37    | 1.38    | 1.83 *  | 1.69    | 1.69    |
| modB      | molybdenum ABC transporter permease protein                             | 1.09 † | 1.05 †  | 1.50 *  | 1.17 *  | 1.05 †  | 1.11 †  | 1.55 *  | 1.14 *  | 1.39 *  | 2.06 *  |
| NWMN_2253 | drug resistance transporter EmrB QacA subfamily protein                 | 1.35 * | 1.46 *  | 1.39 *  | 2.05 *  | 1.58 *  | 1.34 *  | 1.11    | 1.73 *  | 1.87 *  | 1.50 *  |
| NWMN_2185 | iron compound ABC transporter iron compound-binding protein             | 1.22   | 1.50    | 1.10    | 1.68    | 2.04    | 0.91 †  | 0.82 †  | 1.68    | 1.40    | 1.17    |
| NWMN_1035 | N-acetylglucosamidase for bacteriophage phiNM2                          | 1.32 * | 1.62 *  | 1.59 *  | 1.48 *  | 1.38 *  | 1.38 *  | 2.00 *  | 1.46 *  | 1.13    | 1.83 *  |
| NWMN_0945 | hypothetical protein                                                    | 1.51 * | 1.93 ** | 1.44 *  | 1.99 ** | 1.57 *  | 1.74 ** | 1.53 ** | 1.73 ** | 1.86 ** | 1.86 ** |
| NWMN_0151 | similar to ABC transporter ATP-binding protein                          | 1.66   | 1.13 †  | 1.45 †  | 1.26 †  | 0.81 †  | 1.00 †  | 0.71 †  | 1.45    | 1.96    | 1.87 †  |
| NWMN_2489 | hypothetical protein                                                    | 1.24 * | 1.50 *  | 1.51 *  | 1.71 *  | 1.28 *  | 1.13    | 1.15 ** | 1.72 *  | 1.94 *  | 1.33 *  |
| NWMN_1691 | hypothetical protein                                                    | 1.62   | 1.30    | 1.26 †  | 1.88    | 1.93    | 1.34    | 0.91 †  | 1.06 †  | 0.96 †  | 0.77 †  |
| NWMN_1584 | hypothetical protein                                                    | 1.46 * | 1.49 *  | 1.92 *  | 1.73 *  | 0.90 ** | 1.19 *  | 1.22 *  | 1.69 *  | 1.49 *  | 1.12    |
| moaB      | molybdopterin precursor biosynthesis                                    | 1.30 * | 1.11 *  | 1.91 *  | 1.58 *  | 1.35 *  | 1.20 *  | 1.27 *  | 1.47 *  | 1.57 ** | 1.06 *  |
| hsdR      | type-I restriction-modification system restriction endonuclease subunit | 1.24   | 1.57 *  | 1.12    | 1.49 *  | 1.37    | 1.50 *  | 1.55 *  | 1.52 *  | 1.39    | 1.89 *  |
| NWMN_0387 | hypothetical protein                                                    | 1.46   | 1.01 †  | 1.13    | 1.23    | 1.86    | 1.13    | 1.38    | 1.04    | 0.93 †  | 1.01    |
| NWMN_0419 | hypothetical protein                                                    | 1.46 * | 1.42    | 1.05 †  | 1.41    | 1.54 *  | 1.78 *  | 1.83 *  | 0.79 ** | 1.31 †  | 1.15 †  |
| htrA      | serine protease HtrA                                                    | 1.19 * | 1.29 *  | 1.46 *  | 1.54 ** | 1.50 *  | 1.45 *  | 1.21 *  | 1.58 ** | 1.67 ** | 1.83 *  |
| NWMN_0413 | hypothetical protein                                                    | 1.16 * | 1.58 *  | 1.6 *   | 1.80 *  | 1.34 *  | 1.79 *  | 1.63 ** | 1.30 ** | 1.58 ** | 1.43 ** |
| azoR      | acyl carrier protein phosphodiesterase                                  | 1.20 † | 1.03 †  | 1.46 †  | 0.81 ** | 1.42    | 1.16 †  | 1.38 †  | 1.80 *  | 0.95 ** | 1.35 †  |
| thil      | thiamine biosynthesis protein Thil                                      | 1.14   | 1.32    | 1.00 †  | 1.44    | 1.47    | 1.42    | 1.30 †  | 1.51    | 1.75 *  | 1.11    |
| NWMN_0375 | hypothetical protein                                                    | 1.11   | 1.52 *  | 1.46 *  | 1.27    | 1.06    | 1.37 *  | 1.35 *  | 1.16    | 1.72 *  | 1.30 *  |
| NWMN_0615 | hypothetical protein                                                    | 1.26   | 1.49 *  | 1.69 *  | 1.56 *  | 1.29    | 0.89 †  | 0.97 †  | 1.25    | 1.41 *  | 1.46 *  |

|           |                                              |        |        |        |         |        |        |        |        |        |        |
|-----------|----------------------------------------------|--------|--------|--------|---------|--------|--------|--------|--------|--------|--------|
| narJ      | respiratory nitrate reductase delta subunit  | 1.66   | 1.10   | 1.17   | 0.47 *  | 0.65 * | 0.57 * | 0.69 * | 1.09   | 1.05   | 0.89   |
| fda       | fructose-bisphosphate aldolase class-I       | 1.29 * | 1.12 * | 1.42 * | 1.40 *  | 1.03   | 1.47 * | 1.59 * | 1.65 * | 1.58 * | 1.24 * |
| NWMN_0705 | ferrichrome ABC transporter lipoprotein      | 1.43   | 1.35   | 1.25   | 1.27    | 1.51   | 0.69 * | 0.99 * | 1.50   | 1.63 * | 1.53   |
| NWMN_0172 | hypothetical protein                         | 1.26 * | 1.58 * | 1.60 * | 1.25 *  | 1.06   | 1.23   | 1.27 * | 1.48 * | 1.11 * | 0.99 * |
| pdxS      | pyridoxine biosynthesis protein              | 1.31   | 1.20   | 1.14 * | 1.02 *  | 1.16 * | 1.54 * | 1.45 * | 1.17 * | 1.20 * | 0.99 * |
| spa       | immunoglobulin G binding protein A precursor | 1.44   | 0.79 * | 0.64 * | 0.57 *  | 1.19 * | 1.25 * | 1.5 *  | 1.14 * | 0.83 * | 0.70 * |
| ackA      | acetate kinase                               | 1.23   | 1.37 * | 1.28 * | 1.04 *  | 1.41 * | 1.48 * | 1.17 * | 1.34 * | 1.30 * | 1.16   |
| pdxT      | similar to SNO glutamine amidotransferase    | 1.30   | 1.25   | 1.35 * | 0.83 ** | 1.17 * | 1.34 * | 1.20 * | 1.25 * | 1.03 * | 1.10 * |

### NsaSR upregulated, VraSR regulated

|           |                                                          |         |         |         |          |         |         |         |         |         |         |
|-----------|----------------------------------------------------------|---------|---------|---------|----------|---------|---------|---------|---------|---------|---------|
| NWMN_2223 | hypothetical protein                                     | 1.16 ** | 1.53 ** | 7.20 ** | 13.41 ** | 2.51 ** | 2.39 ** | 3.14 ** | 3.22 ** | 4.52 ** | 4.51 ** |
| NWMN_1333 | phosphotransferase system glucose-specific IIA component | 1.19 ** | 1.56 ** | 5.64 ** | 10.84 ** | 1.82 ** | 3.58 ** | 3.42 ** | 1.55 ** | 2.44 ** | 3.66 ** |

### NsaSR upregulated, WalkR regulated

|              |                                                              |         |         |         |         |         |          |         |         |         |         |
|--------------|--------------------------------------------------------------|---------|---------|---------|---------|---------|----------|---------|---------|---------|---------|
| clpB         | ATP-dependent Clp protease ATP-binding subunit               | 1.44 ** | 1.59 ** | 8.96 *  | 36.5 *  | 8.82 ** | 24.43 ** | 32.7 ** | 1.75 ** | 2.33 ** | 1.87 ** |
| ilvA (ilvA1) | threonine dehydratase                                        | 1.26 ** | 1.69 ** | 5.24 *  | 8.49 *  | 3.47 ** | 3.15 **  | 3.91 ** | 1.39 ** | 3.75 *  | 5.75 ** |
| NWMN_2590    | transcriptional regulator PadR-like family protein           | 1.28 ** | 1.19 ** | 1.87 ** | 3.50 ** | 1.99 ** | 4.2 **   | 5.34 ** | 1.54 ** | 1.88 ** | 1.71 ** |
| pyrAB        | carbamoyl-phosphate synthase pyrimidine-specific large chain | 1.77    | 1.90    | 0.97    | 0.73 *  | 2.01 *  | 4.64 *   | 4.26 *  | 2.29 *  | 1.55    | 1.65    |
| glpQ         | glycerophosphoryl diester phosphodiesterase                  | 1.43 *  | 1.61 *  | 1.75 *  | 1.60 *  | 1.36 *  | 1.00 *   | 1.65 *  | 1.62 *  | 2.47 *  | 1.63 *  |
| NWMN_1689    | hypothetical protein                                         | 1.33    | 1.18 *  | 1.82 *  | 2.45 *  | 1.54    | 1.38     | 1.46    | 1.83 *  | 2.05 *  | 1.34    |
| NWMN_1688    | hypothetical protein                                         | 1.70 *  | 1.06 *  | 1.85 *  | 2.12 *  | 1.04    | 1.44 *   | 1.56 *  | 1.56 *  | 1.52    | 1.07 *  |
| NWMN_1070    | similar to fibrinogen-binding protein                        | 1.28 *  | 1.46 *  | 1.30 *  | 1.62 *  | 1.31 *  | 1.65 *   | 1.84 *  | 0.88 *  | 1.60 *  | 1.34 *  |

### NsaSR downregulated

|           |                      |         |        |         |        |         |        |         |        |         |         |
|-----------|----------------------|---------|--------|---------|--------|---------|--------|---------|--------|---------|---------|
| NWMN_1916 | hypothetical protein | 1.26 ** | 2.01 * | 3.65 ** | 2.29 * | 3.34 ** | 3.76 * | 3.89 ** | 9.21 * | 2.36 ** | 3.03 ** |
|-----------|----------------------|---------|--------|---------|--------|---------|--------|---------|--------|---------|---------|

|           |                                                                       |         |         |         |         |         |         |         |         |         |         |
|-----------|-----------------------------------------------------------------------|---------|---------|---------|---------|---------|---------|---------|---------|---------|---------|
| NWMN_0089 | similar to DNA-binding protein                                        | 1.03 ** | 1.10 ** | 6.76 *  | 3.1 *   | 3.55 *  | 1.04 ** | 1.07 ** | 1.09 ** | 1.05 ** | 1.07 ** |
| capE      | capsular polysaccharide biosynthesis protein CapE                     | 1.34 ** | 1.67 ** | 3.85 *  | 3.55 ** | 1.38 ** | 1.80 *  | 2.26 ** | 1.59 ** | 6.62 ** | 6.69 *  |
| capI      | capsular polysaccharide biosynthesis protein CapI                     | 1.21 ** | 2.42 *  | 6.08 *  | 3.63 *  | 3.62 *  | 1.74 *  | 1.87 *  | 2.02 ** | 3.12 ** | 2.78 ** |
| capG      | UDP-N-acetylglucosamine 2-epimerase                                   | 1.26 *  | 1.57 *  | 2.96 *  | 2.96 ** | 1.92 ** | 1.00 *  | 1.97 ** | 1.34 *  | 5.42 ** | 4.39 *  |
| NWMN_1828 | hypothetical protein                                                  | 1.72 *  | 0.98 †  | 2.17 *  | 0.86 †  | 2.67 *  | 3.75 *  | 1.56 *  | 5.22 *  | 2.47 *  | 1.57 *  |
| sspB      | staphopain thiol proteinase                                           | 1.37 *  | 2.34 *  | 4.13 *  | 1.34    | 4.86 *  | 1.84 *  | 1.69 *  | 3.92 *  | 2.51 *  | 1.54 *  |
| capL      | capsular polysaccharide biosynthesis protein glycosyltransferase CapL | 1.58 *  | 4.85 *  | 3.09 ** | 3.07 *  | 1.75 ** | 3.06 *  | 2.89 *  | 2.47 *  | 3.56 ** | 3.39 ** |
| capD      | dTDP-4-dehydrorhamnose reductase                                      | 1.26 ** | 1.69 ** | 1.69 ** | 1.85 ** | 1.58 ** | 2.02 ** | 1.53 ** | 2.02 ** | 3.35 ** | 4.05 ** |
| adhE      | iron-containing alcohol dehydrogenase                                 | 1.39    | 1.99 *  | 2.43 *  | 2.48 *  | 1.39    | 1.50    | 1.76 *  | 3.95 *  | 3.97 *  | 3.28 *  |
| capH      | capsular polysaccharide synthesis enzyme O-acetyl transferase CapH    | 1.29 ** | 3.68 *  | 1.83 *  | 1.77 ** | 1.17 *  | 3.45 *  | 1.43 *  | 1.55 *  | 3.51 *  | 2.85 ** |
| mnhC      | Na-H antiporter component                                             | 1.44 *  | 1.52 *  | 3.64 *  | 2.28 *  | 1.86 *  | 2.12 *  | 2.02 ** | 1.83 ** | 2.42 ** | 2.19 ** |
| sepA      | Antiseptic resistance protein SepA                                    | 1.23 ** | 1.43 *  | 2.55 ** | 2.79 ** | 1.86 ** | 1.71 ** | 2.01 ** | 2.44 *  | 2.56 ** | 2.19 ** |
| NWMN_2407 | hypothetical protein                                                  | 1.17 *  | 1.51 *  | 2.06 *  | 1.73 ** | 0.98 *  | 1.34 *  | 1.11 *  | 1.34 *  | 2.76 ** | 1.85 ** |
| NWMN_0037 | similar to LysR family regulatory protein                             | 1.26    | 0.94 †  | 2.52 *  | 2.41 *  | 2.03 *  | 2.42 *  | 1.42    | 2.13 *  | 1.41    | 2.60 *  |
| NWMN_2468 | acetyltransferase GNAT family protein                                 | 1.19    | 1.05    | 1.74 *  | 1.42    | 1.25    | 1.07 †  | 0.91 †  | 1.46    | 2.49 *  | 1.71 *  |
| sspA      | V8 protease glutamyl endopeptidase precursor                          | 1.14    | 1.90 *  | 1.81 *  | 1.40 *  | 1.52 *  | 1.25    | 0.96 †  | 2.47 *  | 1.53 *  | 1.60 *  |
| hysA      | hyaluronate lyase precursor                                           | 1.47 *  | 1.82 *  | 1.77 *  | 2.31 *  | 1.30 *  | 1.66 *  | 1.87 *  | 1.91 ** | 2.00 ** | 2.47 ** |
| NWMN_1397 | hypothetical protein                                                  | 1.71 *  | 1.11    | 2.46 *  | 2.20 *  | 1.31 *  | 1.42 *  | 1.35 *  | 2.13 *  | 2.05 ** | 1.70 *  |
| capO      | UDP-N-acetyl-D-mannosaminuronic acid dehydrogenase                    | 1.38 *  | 0.77 ** | 1.56 *  | 1.67 *  | 1.43 *  | 0.89 †  | 1.30    | 1.37 *  | 1.86 *  | 1.29    |
| NWMN_0704 | ABC transporter ATP-binding protein                                   | 1.74    | 1.60    | 0.91 †  | 1.58    | 1.30 †  | 0.85 †  | 1.08 †  | 1.20 †  | 1.84 *  | 1.32    |
| NWMN_0313 | phage amidase for bacteriophage phiNM4                                | 1.34 *  | 1.37 *  | 1.36 *  | 1.57 *  | 1.36 *  | 1.31 ** | 1.28 *  | 1.27 *  | 1.31 *  | 1.44 *  |
| NWMN_1769 | amidase for bacteriophage phiNM1                                      | 1.25    | 1.30    | 1.37    | 1.07 †  | 1.12 †  | 1.03 †  | 1.23 †  | 1.26    | 1.38    | 1.27    |

### NsaSR downregulated, WalkR regulated

|      |                      |         |        |         |         |         |         |         |         |         |         |
|------|----------------------|---------|--------|---------|---------|---------|---------|---------|---------|---------|---------|
| spIC | serine protease SpIC | 1.48 *  | 2.57 * | 12.13 * | 3.01 ** | 2.05 ** | 2.44 *  | 2.71 ** | 4.23 ** | 2.36 ** | 2.42 *  |
| spIE | serine protease SpIE | 1.06 ** | 6.93 * | 4.07 *  | 4.91 *  | 11.23 * | 2.29 ** | 1.15 ** | 4.29 *  | 1.64 ** | 2.30 ** |

| spID                     | serine protease SplD                            | 1.18 **        | <b>4.98 *</b>   | 2.63 *         | 2.81 *          | 1.68 **           | <b>6.09 *</b>   | <b>4.32 *</b>   | <b>4.04 *</b>  | <b>7.37 *</b>  | <b>3.24 *</b>   |
|--------------------------|-------------------------------------------------|----------------|-----------------|----------------|-----------------|-------------------|-----------------|-----------------|----------------|----------------|-----------------|
| fnbA                     | fibronectin binding protein A precursor         | 1.40           | 0.78            | 2.01 *         | 2.33 *          | <b>4.76 *</b>     | 2.00 *          | 2.04 **         | 1.44           | 2.08 **        | 1.68 *          |
| splA                     | serine protease SplA                            | 1.89 *         | 1.44            | 1.25 †         | 1.76 *          | 1.22              | 0.95 †          | 1.86 *          | 2.01 *         | 1.42           | 1.37 †          |
| hIb                      | truncated beta-hemolysin                        | 1.22           | 1.29            | 1.58 *         | 1.18            | 1.37 *            | 1.56 *          | 1.70 *          | 1.28           | 1.53 *         | 1.13            |
| <b>NsaSR upregulated</b> |                                                 | <b>Control</b> | <b>PMX30063</b> |                |                 | <b>Daptomycin</b> |                 |                 | <b>LL16</b>    |                |                 |
| <b>Gene</b>              | <b>Gene description</b>                         | <b>[µg/mL]</b> | <b>0.39</b>     | <b>0.78</b>    | <b>1.17</b>     | <b>2.0</b>        | <b>4.0</b>      | <b>6.0</b>      | <b>2.0</b>     | <b>4.0</b>     | <b>6.0</b>      |
| lysC                     | aspartokinase II                                | 1.3 **         | 2.23 **         | <b>7.84 *</b>  | <b>30.62 *</b>  | 1.82 **           | 1.85 **         | 2.68 **         | 1.77 **        | <b>9.53 *</b>  | <b>37.37 *</b>  |
| vraE                     | ABC transporter permease                        | 1.19 **        | <b>3.09 **</b>  | 2.38 **        | <b>3.64 **</b>  | 2.24 **           | 1.19 **         | 1.72 **         | <b>7.89 †</b>  | <b>24.9 **</b> | <b>35.34 †</b>  |
| thrC                     | threonine synthase                              | 1.29 **        | 2.16 **         | <b>4.34 **</b> | <b>24.18 *</b>  | <b>6.13 **</b>    | <b>12.15 **</b> | <b>13.66 **</b> | 2.06 **        | <b>3.67 **</b> | <b>14.22 **</b> |
| metL                     | homoserine dehydrogenase                        | 1.18 **        | 1.40 **         | <b>7.02 **</b> | <b>24.17 *</b>  | <b>7.35 **</b>    | <b>15.51 **</b> | <b>16.64 **</b> | 2.07 **        | <b>3.91 **</b> | <b>16.46 **</b> |
| asd                      | aspartate-semialdehyde dehydrogenase            | 1.31 **        | 1.89 **         | <b>4.05 **</b> | <b>23.41 *</b>  | <b>3.03 **</b>    | <b>4.96 **</b>  | <b>4.72 **</b>  | 2.10 **        | <b>4.10 **</b> | <b>16.12 **</b> |
| vraD                     | ABC transporter ATP binding protein             | 1.20 **        | 1.16 **         | 1.53 **        | 1.59 **         | 1.31 **           | 1.19 **         | 1.94 **         | <b>4.24 **</b> | <b>11.75 *</b> | <b>22.27 **</b> |
| NWMN_2581                | cobalt transport family protein                 | 1.46 **        | 2.99 **         | <b>8.04 *</b>  | <b>15.30 *</b>  | <b>3.48 *</b>     | <b>5.22 **</b>  | <b>5.21 **</b>  | 2.11 **        | <b>3.29 *</b>  | <b>3.69 **</b>  |
| oppD                     | oligopeptide transport ATP-binding protein      | 1.59 *         | 1.54 *          | <b>3.79 *</b>  | <b>14.14 *</b>  | <b>3.65 **</b>    | <b>6.68 *</b>   | <b>6.24 **</b>  | 1.45 *         | <b>3.72 *</b>  | <b>3.40 *</b>   |
| gltB                     | glutamate synthase large subunit                | 1.09 **        | 1.77 **         | <b>3.65 **</b> | <b>5.19 **</b>  | <b>4.39 **</b>    | <b>7.34 **</b>  | <b>8.32 **</b>  | 1.91 **        | <b>4.02 **</b> | <b>12.67 **</b> |
| thrA                     | aspartate kinase                                | 1.47 **        | <b>3.99 *</b>   | <b>5.20 *</b>  | <b>10.59 **</b> | <b>3.96 *</b>     | 2.96 **         | <b>6.90 *</b>   | <b>4.62 *</b>  | <b>4.62 **</b> | <b>4.95 **</b>  |
| thrB                     | homoserine kinase                               | 1.39 **        | 1.60 **         | <b>5.51 *</b>  | <b>10.09 **</b> | <b>4.84 **</b>    | <b>6.15 **</b>  | <b>5.66 **</b>  | 1.97 **        | <b>4.06 **</b> | <b>7.12 **</b>  |
| NWMN_0721                | sigma 54 modulation protein                     | 1.41 *         | 1.25            | <b>4.25 *</b>  | <b>9.56 *</b>   | 2.09 *            | <b>3.61 *</b>   | <b>5.73 *</b>   | 2.10 *         | 1.80 *         | 1.64 *          |
| NWMN_0071                | acetoin reductase                               | 1.37 **        | 1.10 **         | <b>3.07 **</b> | <b>9.37 **</b>  | <b>4.75 **</b>    | <b>5.77 **</b>  | <b>8.04 **</b>  | 2.35 **        | 1.45 **        | <b>5.33 **</b>  |
| NWMN_0215                | hypothetical protein                            | 1.2 **         | <b>5.44 *</b>   | 2.71 **        | <b>8.77 **</b>  | <b>3.70 *</b>     | <b>4.2 **</b>   | 1.54 **         | <b>3.57 *</b>  | <b>4.95 *</b>  | <b>3.88 **</b>  |
| oppC                     | oligopeptide ABC transporter                    | 1.58           | 1.32            | 2.71 **        | <b>8.05 *</b>   | 2.84 *            | <b>3.13 **</b>  | 2.99 **         | 1.02           | 1.64           | <b>3.43 *</b>   |
| NWMN_2444                | hypothetical protein                            | 1.38 **        | 1.07 **         | <b>7.73 *</b>  | <b>4.25 *</b>   | 1.78 **           | <b>4.41 *</b>   | 2.18 *          | 1.60 **        | 2.38 *         | 1.86 *          |
| NWMN_0373                | nitroreductase family protein                   | 1.21 **        | 1.25 *          | <b>3.36 *</b>  | <b>7.68 *</b>   | 1.67 **           | 2.77 **         | 2.77 **         | 2.38 *         | 2.60 **        | 2.27 **         |
| NWMN_0535                | similar to haloacid dehalogenase-like hydrolase | 1.98 *         | <b>7.43 *</b>   | <b>3.31 *</b>  | <b>6.56 *</b>   | <b>3.91 *</b>     | <b>4.16 *</b>   | 2.09 **         | 2.81 **        | <b>5.39 *</b>  | <b>6.41 *</b>   |
| NWMN_2109                | truncated MHC class II analog protein           | 1.62 **        | 1.21 *          | 1.30 **        | <b>3.02 **</b>  | <b>3.91 **</b>    | <b>4.66 **</b>  | <b>7.34 **</b>  | 1.51 **        | 2.62 *         | 2.66 *          |
| ilvD                     | dihydroxy-acid dehydratase                      | 1.56 *         | <b>4.45 *</b>   | <b>3.00 *</b>  | <b>6.91 *</b>   | 2.15 *            | 2.25 **         | <b>4.95 **</b>  | 1.75 **        | 1.37 **        | 2.68 **         |

|           |                                                                |         |                |                |                |                |                |                |                |                |                |
|-----------|----------------------------------------------------------------|---------|----------------|----------------|----------------|----------------|----------------|----------------|----------------|----------------|----------------|
| NWMN_2224 | alpha-glucoside-specific IIBC component                        | 1.45 ** | 1.39 **        | <b>3.44 *</b>  | <b>6.66 **</b> | 1.11 **        | 1.61 *         | 1.39 **        | 2.02 **        | <b>3.71 **</b> | 2.77 **        |
| NWMN_2044 | thiol-disulphide oxidoreductase                                | 1.22 ** | 1.20 **        | <b>3.83 **</b> | <b>4.08 **</b> | <b>3.25 **</b> | 2.63 **        | <b>6.56 **</b> | <b>4.11 *</b>  | <b>3.09 **</b> | 1.65 **        |
| gntP      | gluconate permease                                             | 1.7     | 1.61           | <b>5.38 *</b>  | <b>6.55 *</b>  | 1.31           | 1.86           | 2.19 *         | 2.60 *         | 2.28 *         | <b>3.06 *</b>  |
| NWMN_2473 | hypothetical protein                                           | 1.32 *  | <b>3.96 *</b>  | 2.67 *         | <b>6.38 *</b>  | 2.69 *         | 2.49 **        | <b>3.09 **</b> | 1.67 *         | 1.77 **        | 2.24 *         |
| NWMN_2453 | hypothetical protein                                           | 1.24 ** | 1.38 **        | 1.56 *         | <b>6.11 *</b>  | 1.97 *         | 2.81 *         | 1.94 *         | 2.95 *         | 1.94 *         | <b>3.43 *</b>  |
| malA      | alpha-D-1-4-glucosidase                                        | 1.66    | 1.81           | <b>4.56 *</b>  | <b>6.02 *</b>  | 1.84           | 1.70           | 1.64           | 2.96 *         | 2.92 *         | 2.67 *         |
| NWMN_2043 | similar to non-heme iron-containing ferritin                   | 1.47 ** | 2.43 **        | 1.84 **        | <b>4.16 **</b> | <b>3.38 **</b> | <b>3.51 **</b> | <b>5.91 **</b> | 2.32 **        | 1.69 **        | 1.98 **        |
| leuB      | 3-isopropylmalate dehydrogenase                                | 1.76 ** | 1.69 **        | <b>3.36 **</b> | <b>5.64 **</b> | 2.02 **        | 2.59 **        | <b>3.92 **</b> | 2.84 **        | <b>3.03 **</b> | <b>3.49 **</b> |
| NWMN_0078 | hypothetical protein                                           | 1.42 ** | <b>3.19 **</b> | <b>3.70 **</b> | <b>3.37 **</b> | 2.63 **        | <b>3.77 **</b> | <b>3.32 **</b> | <b>5.45 **</b> | <b>4.25 **</b> | <b>5.2 **</b>  |
| ispD      | similar to 4-diphosphocytidyl-2C-methyl-D- erythritol synthase | 1.4     | 1.19           | 1.97 *         | <b>5.40 *</b>  | 2.18 *         | 2.58 **        | 2.72 **        | 1.73 *         | 1.91 *         | 1.92 *         |
| thiM      | hydroxyethylthiazole kinase                                    | 1.35    | 1.80 *         | <b>3.39 *</b>  | <b>5.26 *</b>  | <b>3.24 *</b>  | 1.21           | 1.44           | 1.99 *         | <b>3.97 *</b>  | 2.99 *         |
| fadD      | acyl-CoA dehydrogenase FadD homolog                            | 1.5 *   | 1.95 *         | 2.13 *         | <b>5.22 *</b>  | 1.64 *         | <b>3.10 *</b>  | <b>3.86 *</b>  | 1.63 *         | 2.97 *         | 2.02 *         |
| NWMN_0896 | hypothetical protein                                           | 1.4 **  | 1.57 **        | 1.98 **        | <b>5.16 *</b>  | 1.77 **        | <b>3.19 **</b> | <b>5.15 **</b> | <b>3.21 *</b>  | <b>3.91 **</b> | <b>3.61 **</b> |
| NWMN_0335 | similar to ribosomal protein-serine acetyltransferase          | 1.32    | <b>3.41 *</b>  | 1.12           | <b>3.19 **</b> | <b>3.15 *</b>  | <b>3.78 *</b>  | <b>5.16 *</b>  | 2.69 *         | 2.06 *         | 2.19 *         |
| NWMN_0897 | lipoate-protein ligase A                                       | 1.19 ** | 1.20 **        | 2.26 *         | <b>5.09 *</b>  | 1.53 *         | 2.54 *         | 2.27 **        | 1.88 **        | 1.53 **        | 2.09 *         |
| oppB      | hypothetical protein                                           | 1.71 *  | <b>4.53 *</b>  | 2.87 **        | 2.78 **        | 2.78 **        | 2.68 *         | 1.56 **        | <b>3.92 *</b>  | <b>5.07 *</b>  | 2.44 **        |
| mobB      | molybdopterin-guanine dinucleotide biosynthesis protein B      | 1.5 **  | 1.36 *         | 2.71 *         | <b>5.06 *</b>  | 2.03 **        | <b>3.04 *</b>  | 2.67 **        | <b>3.38 **</b> | 2.71 **        | 2.41 **        |
| hipO      | hippurate hydrolase                                            | 1.35 *  | 1.27 *         | 1.40 *         | <b>4.95 *</b>  | 1.48 *         | 2.05 *         | 2.77 *         | 1.19 *         | 1.17 *         | 2.61 **        |
| NWMN_2579 | hypothetical protein                                           | 1.56 *  | 1.50 **        | 2.37 **        | <b>4.77 **</b> | 1.34 *         | 1.68 **        | 2.62 *         | 1.91 **        | 2.36 **        | 2.31 **        |
| metH      | 5-methyltetrahydrofolate-homocysteine methyltransferase        | 1.22    | 1.22           | <b>4.11 *</b>  | <b>4.76 *</b>  | 0.91           | 1.71 *         | 1.17           | 2.12 *         | 1.52 *         | <b>4.58 *</b>  |
| NWMN_2459 | D-isomer specific 2-hydroxyacid dehydrogenase family protein   | 1.44    | 1.28           | 2.27 *         | <b>4.69 *</b>  | 1.68 *         | 1.78 *         | 1.10           | 1.89 *         | 1.79 *         | 1.67 *         |
| NWMN_2470 | hypothetical protein                                           | 1.32 *  | 1.07 *         | 1.65 *         | <b>4.63 *</b>  | 1.74 *         | 1.55 **        | 1.48 **        | 1.15 *         | 2.17 *         | 2.61 **        |
| purL      | phosphoribosylformylglycinamide synthase II                    | 1.31 ** | 2.04 *         | <b>4.49 **</b> | <b>3.65 **</b> | 1.49 **        | <b>3.64 **</b> | <b>4.49 **</b> | <b>3.36 **</b> | 2.4 **         | 2.07 **        |
| NWMN_2589 | hypothetical protein                                           | 1.26 ** | 1.39 *         | 1.94 *         | <b>3.34 *</b>  | 1.57 **        | <b>3.74 **</b> | <b>4.49 **</b> | 1.38 **        | 2.18 *         | 1.53 **        |
| NWMN_1640 | hypothetical protein                                           | 1.55 *  | 1.67 *         | 1.95 **        | <b>4.47 **</b> | 1.52 **        | 2.45 *         | 2.48 *         | <b>3.08 *</b>  | 2.42 **        | 2.19 **        |
| opp1B     | oligopeptide transporter putative membrane permease            | 1.48    | 2.25 *         | 2.30 *         | <b>4.42 *</b>  | <b>3.14 *</b>  | <b>3.23 *</b>  | 1.34           | <b>3.38 *</b>  | <b>3.61 *</b>  | 1.16           |

|           |                                                        |         |               |                |                |               |               |                |                |                |                |
|-----------|--------------------------------------------------------|---------|---------------|----------------|----------------|---------------|---------------|----------------|----------------|----------------|----------------|
| NWMN_1998 | transcriptional regulator TenA family protein          | 1.45 *  | 1.18          | 2.15 *         | <b>3.10 *</b>  | 1.25 *        | 1.76 *        | 1.41 *         | 2.23 *         | 1.67 *         | <b>4.32 *</b>  |
| NWMN_0221 | hypothetical protein                                   | 1.21    | <b>4.3 *</b>  | 1.80 *         | 0.97           | 1.81 *        | <b>4.29 *</b> | 2.00 *         | 2.38 *         | 2.04 *         | 2.55 *         |
| fdhD      | formate dehydrogenase family accessory FdhD            | 1.21 ** | 1.39 *        | 2.16 **        | <b>4.24 *</b>  | 2.63 *        | 1.93 **       | 2.26 **        | 2.99 *         | 1.47 *         | 2.39 **        |
| NWMN_2428 | hypothetical protein                                   | 1.36 *  | <b>4.23 *</b> | 2.20 *         | 2.83 *         | <b>3.63 *</b> | 2.60 *        | <b>3.76 **</b> | 1.63 **        | 2.12 *         | 2.77 **        |
| mtlF      | mannitol-specific IIBC component                       | 1.94    | <b>4.20 *</b> | 2.63 *         | 2.20           | 2.73 *        | 2.42 *        | <b>3.46 *</b>  | 2.57 *         | 2.84 *         | 2.01           |
| narI      | respiratory nitrate reductase gamma subunit            | 1.2     | 1.87          | 2.18           | 0.92           | 1.01          | 1.54          | 1.02           | 1.62           | <b>4.20 *</b>  | 2.20           |
| NWMN_1395 | hypothetical protein                                   | 1.71 *  | 1.23 *        | 2.72 *         | <b>3.52 **</b> | 2.58 *        | 1.99 *        | 1.66 **        | <b>4.04 *</b>  | <b>3.66 **</b> | <b>3.06 **</b> |
| purF      | glutamine phosphoribosylpyrophosphate amidotransferase | 1.27 ** | 1.94 *        | <b>3.89 **</b> | 2.48 **        | 2.60 *        | 2.97 *        | <b>3.70 *</b>  | 2.5 *          | 2.03 **        | 2.55 **        |
| thiD      | phosphomethylpyrimidine kinase                         | 1.45 *  | 0.89          | 1.89 *         | <b>3.87 *</b>  | 1.62 **       | 1.19 *        | 1.54 *         | <b>3.23 **</b> | 1.71 *         | 2.11 *         |
| NWMN_2608 | hypothetical protein                                   | 1.24 *  | <b>3.77 *</b> | 1.47 *         | 1.73 **        | 2.58 *        | 0.94          | 1.44 *         | 2.27 *         | 1.97 *         | 1.79 **        |
| srtB      | NPQTN-specific sortase B                               | 1.27 ** | 2.55 *        | 1.69 **        | 2.66 *         | 2.63 *        | 1.78 **       | 2.07 *         | <b>3.76 *</b>  | <b>3.18 **</b> | 2.14 **        |
| ilvE      | branched-chain-amino-acid aminotransferase             | 1.23 ** | 1.56 **       | 2.70 *         | <b>3.75 **</b> | 1.33 *        | 2.16 **       | 2.21 **        | 1.42 **        | 1.75 **        | <b>3.43 *</b>  |
| NWMN_1941 | similar to nitroreductase family protein               | 1.35 *  | <b>3.46 *</b> | 1.62 *         | 2.46 *         | 1.73 *        | 1.71 *        | 2.79 *         | 2.70 *         | 2.02 *         | 1.68 *         |
| fmhA      | methicillin resistance determinant fmhA protein        | 1.23 ** | 2.31 *        | <b>3.21 **</b> | 2.37 *         | 2.26 **       | 2.80 **       | <b>3.43 *</b>  | 2.12 **        | 2.18 **        | 2.40 **        |
| NWMN_2491 | hypothetical protein                                   | 1.28 ** | 1.37 *        | 2.09 *         | <b>3.38 **</b> | <b>3.23 *</b> | 1.78 **       | 2.30 **        | 1.51 *         | <b>3.09 **</b> | 1.81 **        |
| NWMN_2472 | hypothetical protein                                   | 1.32    | 1.75 *        | 1.36           | 1.93 *         | 2.44 *        | 1.78 *        | <b>3.37 *</b>  | 1.49 *         | 2.17 *         | 1.18           |
| NWMN_0894 | nucleotidase family protein                            | 1.18 ** | 1.44 *        | 1.49 **        | <b>3.35 **</b> | 1.97 *        | 2.14 **       | 1.78 **        | 2.05 *         | 1.90 **        | 2.27 **        |
| NWMN_0175 | flavoheмоprotein                                       | 1.42    | 1.37          | 2.51 *         | <b>3.25 *</b>  | 0.84 †        | 0.80 †        | 0.77 †         | 2.21 *         | 1.02 †         | 1.11           |
| scdA      | cell wall metabolism protein                           | 1.55 *  | 1.63 *        | 1.51 *         | <b>3.23 *</b>  | 1.68 *        | 1.26          | 1.77 *         | 2.21 *         | 1.70 *         | 2.36 *         |
| NWMN_1773 | N-acetylglucosamidase for bacteriophage phiNM1         | 1.1 **  | 1.56 **       | <b>3.22 *</b>  | 2.57 **        | 1.76 *        | 1.53 *        | 2.23 **        | 1.24 *         | 2.21 **        | 1.65 **        |
| NWMN_2425 | hypothetical protein                                   | 1.68 *  | 2.66 *        | 2.22 *         | 2.07 **        | 2.00 *        | <b>3.09 *</b> | <b>3.14 *</b>  | <b>3.03 *</b>  | 1.57 *         | 2.45 *         |
| nirR      | nitrite reductase transcriptional regulator NirR       | 1.73    | 1.24          | 2.11           | 1.39           | 1.03          | 2.78          | 0.93           | <b>3.10</b>    | 1.26           | 1.54           |
| tagB      | teichoic acid biosynthesis protein B                   | 1.4 *   | 2.20 *        | <b>3.10 *</b>  | 2.75 **        | 1.90 **       | 2.02 **       | 1.79 **        | 1.28 **        | 2.29 *         | 1.92 *         |
| NWMN_2002 | hypothetical protein                                   | 1.25 *  | 1.40 *        | 2.02 *         | <b>3.10 *</b>  | 0.77 **       | 1.87 *        | 1.20 *         | 1.63 *         | 1.86 *         | 1.24 *         |
| arcC      | carbamate kinase                                       | 1.32 *  | 1.47 *        | 2.42 **        | 2.61 **        | 1.93 **       | <b>3.04 *</b> | 1.50 *         | 2.36 **        | 1.83 **        | 2.58 **        |
| NWMN_0177 | similar to PTS transport system IIBC component         | 1.32    | 1.58 *        | 2.37 *         | 3.00 **        | 1.65 *        | 1.70 *        | 1.94 *         | 1.54 *         | 1.59 *         | 1.72 *         |

|            |                                                                    |         |         |         |         |         |         |         |         |         |         |
|------------|--------------------------------------------------------------------|---------|---------|---------|---------|---------|---------|---------|---------|---------|---------|
| aroC       | chorismate synthase                                                | 1.15    | 1.74 *  | 2.24 *  | 2.99 *  | 2.22 *  | 2.07 *  | 1.38 *  | 2.71 *  | 1.75 ** | 1.49 ** |
| ldh (ldh2) | L-lactate dehydrogenase 2                                          | 1.24    | 1.49    | 1.98 *  | 2.92 *  | 1.31    | 1.91 *  | 1.97 *  | 2.12 *  | 1.26    | 1.59    |
| NWMN_1226  | hypothetical protein                                               | 1.31 *  | 1.33 *  | 2.17 *  | 1.90 *  | 1.40 *  | 0.90 ** | 1.01 †  | 1.32 *  | 1.06 †  | 2.92 *  |
| NWMN_2379  | hypothetical protein                                               | 1.29 *  | 2.74 *  | 2.90 *  | 1.34 *  | 2.18 *  | 1.60 *  | 1.35 *  | 1.83 *  | 2.25 *  | 2.02 *  |
| ipdC       | indole-3-pyruvate decarboxylase                                    | 1.72    | 2.25 *  | 2.89 *  | 2.59 *  | 1.28    | 1.02    | 1.43    | 1.57    | 1.71    | 1.30    |
| opuCA      | glycine betaine FL-proline transport ATP-binding subunit           | 1.27    | 1.31    | 1.65 *  | 2.88 ** | 1.20    | 1.75 *  | 1.63 *  | 1.29    | 1.03    | 1.47 *  |
| mutL       | DNA mismatch repair protein MutL                                   | 1.17 ** | 1.62 *  | 2.35 ** | 2.87 ** | 2.16 ** | 2.02 ** | 2.12 ** | 2.20 ** | 2.48 ** | 2.07 ** |
| NWMN_1930  | similar to tetracenomycin polyketide synthesis O-methyltransferase | 1.49    | 2.55 *  | 1.70 *  | 1.48    | 1.48    | 2.26 *  | 0.90 †  | 2.86 *  | 1.76 *  | 2.63 *  |
| NWMN_0222  | hypothetical protein                                               | 1.3     | 1.49    | 1.30    | 2.85 *  | 1.50    | 2.57 *  | 1.05 †  | 1.92 *  | 2.80 *  | 1.34    |
| sdrC       | Ser-Asp rich fibrinogen bone sialoprotein-binding protein SdrC     | 1.26 ** | 1.31 ** | 1.50 *  | 1.82 ** | 2.01 ** | 2.60 *  | 2.85 *  | 1.87 *  | 2.54 ** | 2.24 ** |
| NWMN_0269  | hypothetical protein                                               | 1.43 *  | 2.84 ** | 1.95 ** | 2.18 ** | 1.60 *  | 2.14 *  | 2.35 *  | 1.70 ** | 2.31 ** | 2.36 *  |
| NWMN_2538  | hypothetical protein                                               | 1.36 *  | 1.65 *  | 2.07 *  | 1.76 *  | 2.48 *  | 2.19 *  | 2.11 *  | 2.81 *  | 2.64 *  | 1.28 *  |
| NWMN_0220  | hypothetical protein                                               | 1.59 *  | 1.57 *  | 1.54 *  | 1.26 *  | 1.72 *  | 2.79 *  | 1.87 *  | 1.89 *  | 1.78 *  | 1.36 *  |
| NWMN_2036  | hypothetical protein                                               | 1.26 ** | 1.51 *  | 1.86 ** | 2.79 ** | 1.92 ** | 2.43 ** | 2.20 ** | 1.80 *  | 1.86 ** | 2.45 ** |
| glcA       | glucose-specific PTS transporter protein IIABC component           | 1.52    | 1.39    | 2.09    | 1.77    | 1.39    | 1.37    | 1.48    | 1.70    | 2.73 *  | 2.59 *  |
| NWMN_2451  | MmpL efflux pump                                                   | 1.37 *  | 1.21 *  | 2.04 *  | 2.00 *  | 1.86 ** | 1.82 *  | 1.32 *  | 2.73 *  | 2.32 ** | 1.68 ** |
| treR       | trehalose operon repressor                                         | 1.48 *  | 1.43 *  | 1.48 *  | 1.95 *  | 1.68 *  | 1.14    | 1.15    | 2.70 *  | 2.10 *  | 1.64 *  |
| NWMN_0656  | cobalamin synthesis protein                                        | 1.23 ** | 2.28 ** | 2.10 *  | 1.67 ** | 1.66 ** | 2.18 *  | 1.73 *  | 2.23 *  | 2.70 *  | 1.59 ** |
| NWMN_0186  | zinc-containing alcohol dehydrogenase                              | 1.42    | 1.67    | 2.68 *  | 2.35 *  | 1.01    | 1.55    | 1.18    | 1.24    | 1.19    | 1.97    |
| entB       | isochorismatase                                                    | 1.37 *  | 1.59 *  | 2.60 *  | 2.40 *  | 0.90    | 0.93    | 1.98 *  | 2.59 *  | 2.61 ** | 1.54 ** |
| isaB       | immunodominant antigen B                                           | 1.39 *  | 1.84 *  | 2.00 *  | 2.33 ** | 2.01 *  | 2.02 *  | 2.55 *  | 2.59 *  | 2.54 ** | 2.44 *  |
| NWMN_2196  | hypothetical protein                                               | 1.46 *  | 1.69 *  | 1.16 *  | 2.59 *  | 1.13 *  | 1.29 *  | 1.23 *  | 1.33 *  | 1.76 *  | 1.49 *  |
| NWMN_2254  | similar to multidrug resistance protein A                          | 1.61 *  | 1.47    | 1.38    | 2.57 *  | 2.48 *  | 1.28    | 0.89 †  | 1.81 *  | 1.40    | 1.66 *  |
| NWMN_2303  | formate nitrite transporter family protein                         | 1.52 *  | 1.66 *  | 1.24 *  | 0.95    | 1.34 *  | 2.54 *  | 1.82 *  | 1.86 *  | 1.91 *  | 1.31 *  |
| NWMN_2421  | NADH-flavin oxidoreductase                                         | 1.28 *  | 1.17    | 1.39 *  | 1.85 *  | 1.74 ** | 2.47 *  | 2.2 **  | 1.89 *  | 1.85 *  | 1.73 *  |
| dnaA       | chromosomal replication initiator protein DnaA                     | 1.26 *  | 1.48 *  | 1.76 *  | 2.46 *  | 1.18 *  | 1.84 *  | 1.37 *  | 1.82 *  | 1.84 ** | 1.81 *  |

|           |                                                    |         |         |         |         |         |         |         |         |         |         |
|-----------|----------------------------------------------------|---------|---------|---------|---------|---------|---------|---------|---------|---------|---------|
| NWMN_2239 | aldose 1-epimerase precursor                       | 1.38 *  | 1.76 *  | 1.54 *  | 1.76 ** | 1.68 ** | 2.37 *  | 1.82 *  | 2.45 ** | 2.10 ** | 1.84 ** |
| NWMN_0912 | similar to menaquinone-specific isochorismate      | 1.17 ** | 1.76 *  | 2.35 ** | 2.44 *  | 1.67 *  | 1.53 *  | 1.27 *  | 1.29 ** | 1.80 ** | 1.74 *  |
| NWMN_2607 | hypothetical protein                               | 1.48    | 1.61 *  | 2.39 *  | 1.52    | 1.87 *  | 0.74 ** | 0.92 ** | 1.81 *  | 1.41 *  | 1.37 *  |
| metB      | cystathionine gamma-synthase                       | 1.28 †  | 1.51 *  | 2.38 *  | 1.51 *  | 0.95 ** | 1.03 †  | 1.33 †  | 0.97 ** | 2.01 *  | 1.44 †  |
| NWMN_2186 | acyl-CoA dehydrogenase-related protein             | 1.33 *  | 1.09    | 1.92 *  | 1.60 *  | 1.35 *  | 2.38 *  | 2.22 ** | 1.99 ** | 1.51 *  | 1.57 *  |
| NWMN_0944 | similar to ABC transporter ATP-binding protein     | 1.3 **  | 2.16 ** | 2.37 ** | 1.89 ** | 1.54 ** | 1.91 ** | 1.82 ** | 2.21 ** | 2.01 ** | 1.21 *  |
| NWMN_0800 | haloacid dehalogenase-like family protein          | 1.27 *  | 1.12    | 1.50 *  | 2.34 *  | 0.89 †  | 1.23    | 0.95    | 1.36 *  | 2.17 *  | 2.35 *  |
| NWMN_1888 | tail tape measure protein for bacteriophage phiNM3 | 1.23 *  | 1.39 *  | 2.00 *  | 1.32 *  | 1.36 *  | 1.53 *  | 1.92 ** | 1.29 *  | 2.18 *  | 2.35 *  |
| NWMN_2304 | hypothetical protein                               | 2.04    | 1.17 †  | 1.12 †  | 1.62    | 1.00 †  | 1.03 †  | 1.09 †  | 2.35    | 1.76    | 1.07 †  |
| treC      | C alpha-phosphotrehalase                           | 1.58 *  | 1.93 *  | 1.83 *  | 1.97 *  | 1.59 *  | 1.38 *  | 1.16    | 2.21 *  | 2.33 *  | 2.02 *  |
| NWMN_0561 | hypothetical protein                               | 1.25 *  | 1.32 *  | 2.30 *  | 1.61 *  | 1.00 †  | 1.51 *  | 1.54 *  | 1.41 *  | 2.26 *  | 1.45 *  |
| NWMN_0249 | nucleotidase lipoprotein family protein            | 1.37    | 1.88 *  | 0.79 ** | 0.54 ** | 1.01 †  | 1.23 †  | 1.24 †  | 2.30 *  | 1.25 †  | 0.90 †  |
| NWMN_0777 | hypothetical protein                               | 1.33 *  | 1.70 *  | 1.76 *  | 1.65 *  | 1.47 *  | 1.97 *  | 1.90 *  | 2.30 ** | 1.33 ** | 1.56 *  |
| moeA      | molybdopterin biosynthesis protein MoeA            | 1.49 *  | 1.70 *  | 2.14 *  | 2.29 *  | 1.47 ** | 1.61 *  | 1.74 *  | 1.43 ** | 1.94 ** | 1.91 *  |
| NWMN_0115 | hypothetical protein                               | 1.42    | 1.70    | 1.66    | 1.85 *  | 1.92 *  | 1.05    | 1.00    | 1.74    | 2.28 *  | 1.34    |
| narH      | nitrate reductase beta chain                       | 1.15    | 2.25    | 1.23    | 1.26    | 0.92    | 0.65    | 1.30    | 1.23    | 1.12    | 1.08    |
| NWMN_0256 | hypothetical protein                               | 1.79    | 0.89    | 1.60    | 2.24    | 1.85    | 0.92    | 1.26    | 1.86    | 1.96    | 1.23    |
| mvaS      | 3-hydroxy-3-methylglutaryl coenzyme A synthase     | 1.39 *  | 2.01 *  | 1.43 ** | 2.24 *  | 1.73 ** | 1.67 ** | 1.53 ** | 2.05 ** | 1.97 ** | 1.58 ** |
| NWMN_0943 | similar to cobalt transport protein                | 1.32 *  | 1.51 ** | 2.24 ** | 1.95 *  | 1.19 *  | 1.59 ** | 1.56 ** | 1.42 *  | 1.91 *  | 1.34 *  |
| NWMN_2386 | similar to helicase                                | 1.21 *  | 1.62 *  | 1.25 *  | 1.94 *  | 1.36 *  | 2.13 *  | 1.53 *  | 1.54 ** | 2.21 *  | 1.76 *  |
| NWMN_0223 | hypothetical protein                               | 1.31 *  | 1.35 *  | 1.81 *  | 1.75 *  | 1.21 *  | 2.12 *  | 2.21 *  | 1.74 ** | 1.71 ** | 1.40 *  |
| NWMN_2447 | methylated-DNA-protein-cysteine methyltransferase  | 1.23 *  | 1.39 *  | 1.71 *  | 2.20 *  | 1.17 *  | 1.21 *  | 1.33 *  | 1.38 *  | 1.59 *  | 1.64 *  |
| NWMN_2240 | hypothetical protein                               | 1.29 *  | 1.60 *  | 1.74 *  | 1.42 *  | 1.81 *  | 1.56 *  | 1.48 *  | 2.20 ** | 1.75 ** | 1.25 ** |
| narG      | nitrate reductase alpha subunit                    | 1.27    | 2.04    | 1.28    | 1.29    | 1.61    | 1.30    | 2.18    | 1.44    | 1.47    | 1.05    |
| NWMN_2392 | hypothetical protein                               | 1.37 *  | 1.31 *  | 1.87 *  | 1.60 *  | 1.46 ** | 1.70 *  | 2.00 *  | 2.07 *  | 2.18 ** | 1.94 *  |
| NWMN_2241 | hypothetical protein                               | 1.16 *  | 1.36 *  | 1.81 *  | 2.02 *  | 1.52 *  | 2.08 *  | 1.92 *  | 1.84 *  | 2.17 *  | 1.68 *  |



|           |                                                                         |        |         |         |         |         |         |         |         |         |         |
|-----------|-------------------------------------------------------------------------|--------|---------|---------|---------|---------|---------|---------|---------|---------|---------|
| NWMN_0114 | cation efflux family protein                                            | 1.26   | 1.51 *  | 1.63 *  | 1.21    | 1.80 *  | 1.45 *  | 1.15    | 1.29    | 2.15 *  | 1.66 *  |
| queC      | 7-cyano-7-carbaguanine synthase                                         | 1.32 * | 1.72 *  | 1.79 *  | 1.51 *  | 1.70 *  | 2.12 *  | 1.38 *  | 1.52 *  | 2.05 *  | 1.31 *  |
| NWMN_1990 | hypothetical protein                                                    | 1.21   | 2.12 *  | 1.56    | 1.51    | 1.35    | 1.10    | 1.29    | 1.35    | 1.67    | 1.15    |
| sbcD      | exonuclease SbcD                                                        | 1.2 *  | 2.12 *  | 2.09 ** | 1.77 ** | 1.35 ** | 1.40 *  | 1.17 *  | 1.56 *  | 1.67 ** | 1.52 *  |
| modC      | molybdenum ABC transporter ATP-binding protein                          | 1.39 * | 1.49 *  | 1.19    | 1.47 *  | 1.27    | 1.77 *  | 2.09 *  | 1.44 *  | 1.76 *  | 1.59 *  |
| NWMN_0119 | hypothetical protein                                                    | 1.24   | 1.42    | 2.09 *  | 0.90 †  | 0.99    | 1.37    | 1.38    | 1.83 *  | 1.69    | 1.69    |
| modB      | molybdenum ABC transporter permease protein                             | 1.09 † | 1.05 †  | 1.50 *  | 1.17 *  | 1.05 †  | 1.11 †  | 1.55 *  | 1.14 *  | 1.39 *  | 2.06 *  |
| NWMN_2253 | drug resistance transporter EmrB QacA subfamily protein                 | 1.35 * | 1.46 *  | 1.39 *  | 2.05 *  | 1.58 *  | 1.34 *  | 1.11    | 1.73 *  | 1.87 *  | 1.50 *  |
| NWMN_2185 | iron compound ABC transporter iron compound-binding protein             | 1.22   | 1.50    | 1.10    | 1.68    | 2.04    | 0.91 †  | 0.82 †  | 1.68    | 1.40    | 1.17    |
| NWMN_1035 | N-acetylglucosamidase for bacteriophage phiNM2                          | 1.32 * | 1.62 *  | 1.59 *  | 1.48 *  | 1.38 *  | 1.38 *  | 2.00 *  | 1.46 *  | 1.13    | 1.83 *  |
| NWMN_0945 | hypothetical protein                                                    | 1.51 * | 1.93 ** | 1.44 *  | 1.99 ** | 1.57 *  | 1.74 ** | 1.53 ** | 1.73 ** | 1.86 ** | 1.86 ** |
| NWMN_0151 | similar to ABC transporter ATP-binding protein                          | 1.66   | 1.13 †  | 1.45 †  | 1.26 †  | 0.81 †  | 1.00 †  | 0.71 †  | 1.45    | 1.96    | 1.87 †  |
| NWMN_2489 | hypothetical protein                                                    | 1.24 * | 1.50 *  | 1.51 *  | 1.71 *  | 1.28 *  | 1.13    | 1.15 ** | 1.72 *  | 1.94 *  | 1.33 *  |
| NWMN_1691 | hypothetical protein                                                    | 1.62   | 1.30    | 1.26 †  | 1.88    | 1.93    | 1.34    | 0.91 †  | 1.06 †  | 0.96 †  | 0.77 †  |
| NWMN_1584 | hypothetical protein                                                    | 1.46 * | 1.49 *  | 1.92 *  | 1.73 *  | 0.90 ** | 1.19 *  | 1.22 *  | 1.69 *  | 1.49 *  | 1.12    |
| moaB      | molybdopterin precursor biosynthesis                                    | 1.3 *  | 1.11 *  | 1.91 *  | 1.58 *  | 1.35 *  | 1.20 *  | 1.27 *  | 1.47 *  | 1.57 ** | 1.06 *  |
| hsdR      | type-I restriction-modification system restriction endonuclease subunit | 1.24   | 1.57 *  | 1.12    | 1.49 *  | 1.37    | 1.50 *  | 1.55 *  | 1.52 *  | 1.39    | 1.89 *  |
| NWMN_0387 | hypothetical protein                                                    | 1.46   | 1.01 †  | 1.13    | 1.23    | 1.86    | 1.13    | 1.38    | 1.04    | 0.93 †  | 1.01    |
| NWMN_0419 | hypothetical protein                                                    | 1.46 * | 1.42    | 1.05 †  | 1.41    | 1.54 *  | 1.78 *  | 1.83 *  | 0.79 ** | 1.31 †  | 1.15 †  |
| htrA      | serine protease HtrA                                                    | 1.19 * | 1.29 *  | 1.46 *  | 1.54 ** | 1.50 *  | 1.45 *  | 1.21 *  | 1.58 ** | 1.67 ** | 1.83 *  |
| NWMN_0413 | hypothetical protein                                                    | 1.16 * | 1.58 *  | 1.6 *   | 1.80 *  | 1.34 *  | 1.79 *  | 1.63 ** | 1.30 ** | 1.58 ** | 1.43 ** |
| azoR      | acyl carrier protein phosphodiesterase                                  | 1.2 †  | 1.03 †  | 1.46 †  | 0.81 ** | 1.42    | 1.16 †  | 1.38 †  | 1.80 *  | 0.95 ** | 1.35 †  |
| thil      | thiamine biosynthesis protein Thil                                      | 1.14   | 1.32    | 1.00 †  | 1.44    | 1.47    | 1.42    | 1.30 †  | 1.51    | 1.75 *  | 1.11    |
| NWMN_0375 | hypothetical protein                                                    | 1.11   | 1.52 *  | 1.46 *  | 1.27    | 1.06    | 1.37 *  | 1.35 *  | 1.16    | 1.72 *  | 1.30 *  |
| NWMN_0615 | hypothetical protein                                                    | 1.26   | 1.49 *  | 1.69 *  | 1.56 *  | 1.29    | 0.89 †  | 0.97 †  | 1.25    | 1.41 *  | 1.46 *  |
| narJ      | respiratory nitrate reductase delta subunit                             | 1.66   | 1.10    | 1.17    | 0.47 †  | 0.65 †  | 0.57 †  | 0.69 †  | 1.09    | 1.05    | 0.89    |

|           |                                              |        |        |        |         |        |        |        |        |        |        |
|-----------|----------------------------------------------|--------|--------|--------|---------|--------|--------|--------|--------|--------|--------|
| fda       | fructose-bisphosphate aldolase class-I       | 1.29 * | 1.12 * | 1.42 * | 1.40 *  | 1.03   | 1.47 * | 1.59 * | 1.65 * | 1.58 * | 1.24 * |
| NWMN_0705 | ferrichrome ABC transporter lipoprotein      | 1.43   | 1.35   | 1.25   | 1.27    | 1.51   | 0.69 † | 0.99 † | 1.50   | 1.63 * | 1.53   |
| NWMN_0172 | hypothetical protein                         | 1.26 * | 1.58 * | 1.60 * | 1.25 *  | 1.06   | 1.23   | 1.27 * | 1.48 * | 1.11 † | 0.99 † |
| pdxS      | pyridoxine biosynthesis protein              | 1.31   | 1.20   | 1.14 † | 1.02 †  | 1.16 † | 1.54 † | 1.45 † | 1.17 † | 1.20 † | 0.99 † |
| spa       | immunoglobulin G binding protein A precursor | 1.44   | 0.79 † | 0.64 † | 0.57 †  | 1.19 † | 1.25 † | 1.5 †  | 1.14 † | 0.83 † | 0.70 † |
| ackA      | acetate kinase                               | 1.23   | 1.37 * | 1.28 * | 1.04 †  | 1.41 * | 1.48 * | 1.17 † | 1.34 * | 1.30 * | 1.16   |
| pdxT      | similar to SNO glutamine amidotransferase    | 1.3    | 1.25   | 1.35 † | 0.83 ** | 1.17 † | 1.34 † | 1.20 † | 1.25 † | 1.03 † | 1.10 † |

### NsaSR upregulated, VraSR regulated

|           |                                                          |         |         |                |                 |         |                |                |                |                |                |
|-----------|----------------------------------------------------------|---------|---------|----------------|-----------------|---------|----------------|----------------|----------------|----------------|----------------|
| NWMN_2223 | hypothetical protein                                     | 1.16 ** | 1.53 ** | <b>7.20 **</b> | <b>13.41 **</b> | 2.51 ** | 2.39 **        | <b>3.14 **</b> | <b>3.22 **</b> | <b>4.52 **</b> | <b>4.51 **</b> |
| NWMN_1333 | phosphotransferase system glucose-specific IIA component | 1.19 ** | 1.56 ** | <b>5.64 **</b> | <b>10.84 **</b> | 1.82 ** | <b>3.58 **</b> | <b>3.42 **</b> | 1.55 **        | 2.44 **        | <b>3.66 **</b> |

### NsaSR upregulated, WalkR regulated

|              |                                                              |         |         |               |                |                |                 |                |         |               |                |
|--------------|--------------------------------------------------------------|---------|---------|---------------|----------------|----------------|-----------------|----------------|---------|---------------|----------------|
| clpB         | ATP-dependent Clp protease ATP-binding subunit               | 1.44 ** | 1.59 ** | <b>8.96 *</b> | <b>36.5 *</b>  | <b>8.82 **</b> | <b>24.43 **</b> | <b>32.7 **</b> | 1.75 ** | 2.33 **       | 1.87 **        |
| ilvA (ilvA1) | threonine dehydratase                                        | 1.26 ** | 1.69 ** | <b>5.24 *</b> | <b>8.49 *</b>  | <b>3.47 **</b> | <b>3.15 **</b>  | <b>3.91 **</b> | 1.39 ** | <b>3.75 *</b> | <b>5.75 **</b> |
| NWMN_2590    | transcriptional regulator PadR-like family protein           | 1.28 ** | 1.19 ** | 1.87 **       | <b>3.50 **</b> | 1.99 **        | <b>4.2 **</b>   | <b>5.34 **</b> | 1.54 ** | 1.88 **       | 1.71 **        |
| pyrAB        | carbamoyl-phosphate synthase pyrimidine-specific large chain | 1.77    | 1.90    | 0.97          | 0.73 †         | 2.01 *         | <b>4.64 *</b>   | <b>4.26 *</b>  | 2.29 *  | 1.55          | 1.65           |
| glpQ         | glycerophosphoryl diester phosphodiesterase                  | 1.43 *  | 1.61 *  | 1.75 *        | 1.60 *         | 1.36 *         | 1.00 †          | 1.65 *         | 1.62 *  | 2.47 *        | 1.63 *         |
| NWMN_1689    | hypothetical protein                                         | 1.33    | 1.18 †  | 1.82 *        | 2.45 *         | 1.54           | 1.38            | 1.46           | 1.83 *  | 2.05 *        | 1.34           |
| NWMN_1688    | hypothetical protein                                         | 1.70 *  | 1.06 †  | 1.85 *        | 2.12 *         | 1.04           | 1.44 †          | 1.56 *         | 1.56 *  | 1.52          | 1.07 †         |
| NWMN_1070    | similar to fibrinogen-binding protein                        | 1.28 *  | 1.46 *  | 1.30 *        | 1.62 *         | 1.31 *         | 1.65 *          | 1.84 *         | 0.88 †  | 1.60 *        | 1.34 *         |

### NsaSR downregulated

|           |                                |         |         |                |              |                |               |                |               |         |                |
|-----------|--------------------------------|---------|---------|----------------|--------------|----------------|---------------|----------------|---------------|---------|----------------|
| NWMN_1916 | hypothetical protein           | 1.26 ** | 2.01 *  | <b>3.65 **</b> | 2.29 *       | <b>3.34 **</b> | <b>3.76 *</b> | <b>3.89 **</b> | <b>9.21 *</b> | 2.36 ** | <b>3.03 **</b> |
| NWMN_0089 | similar to DNA-binding protein | 1.03 ** | 1.10 ** | <b>6.76 *</b>  | <b>3.1 *</b> | <b>3.55 *</b>  | 1.04 **       | 1.07 **        | 1.09 **       | 1.05 ** | 1.07 **        |

|           |                                                                       |         |               |                |                |               |               |         |               |                |                |
|-----------|-----------------------------------------------------------------------|---------|---------------|----------------|----------------|---------------|---------------|---------|---------------|----------------|----------------|
| capE      | capsular polysaccharide biosynthesis protein CapE                     | 1.34 ** | 1.67 **       | <b>3.85 *</b>  | <b>3.55 **</b> | 1.38 **       | 1.8 *         | 2.26 ** | 1.59 **       | <b>6.62 **</b> | <b>6.69 *</b>  |
| capI      | capsular polysaccharide biosynthesis protein CapI                     | 1.21 ** | 2.42 *        | <b>6.08 *</b>  | <b>3.63 *</b>  | <b>3.62 *</b> | 1.74 *        | 1.87 *  | 2.02 **       | <b>3.12 **</b> | 2.78 **        |
| capG      | UDP-N-acetylglucosamine 2-epimerase                                   | 1.26 *  | 1.57 *        | 2.96 *         | 2.96 **        | 1.92 **       | 1.00 *        | 1.97 ** | 1.34 *        | <b>5.42 **</b> | <b>4.39 *</b>  |
| NWMN_1828 | hypothetical protein                                                  | 1.72 *  | 0.98 †        | 2.17 *         | 0.86 †         | 2.67 *        | <b>3.75 *</b> | 1.56 *  | <b>5.22 *</b> | 2.47 *         | 1.57 *         |
| sspB      | staphopain thiol proteinase                                           | 1.37 *  | 2.34 *        | <b>4.13 *</b>  | 1.34           | <b>4.86 *</b> | 1.84 *        | 1.69 *  | <b>3.92 *</b> | 2.51 *         | 1.54 *         |
| capL      | capsular polysaccharide biosynthesis protein glycosyltransferase CapL | 1.58 *  | <b>4.85 *</b> | <b>3.09 **</b> | <b>3.07 *</b>  | 1.75 **       | <b>3.06 *</b> | 2.89 *  | 2.47 *        | <b>3.56 **</b> | <b>3.39 **</b> |
| capD      | dTDP-4-dehydrorhamnose reductase                                      | 1.26 ** | 1.69 **       | 1.69 **        | 1.85 **        | 1.58 **       | 2.02 **       | 1.53 ** | 2.02 **       | <b>3.35 **</b> | <b>4.05 **</b> |
| adhE      | iron-containing alcohol dehydrogenase                                 | 1.39    | 1.99 *        | 2.43 *         | 2.48 *         | 1.39          | 1.50          | 1.76 *  | <b>3.95 *</b> | <b>3.97 *</b>  | <b>3.28 *</b>  |
| capH      | capsular polysaccharide synthesis enzyme O-acetyl transferase CapH    | 1.29 ** | <b>3.68 *</b> | 1.83 *         | 1.77 **        | 1.17 *        | <b>3.45 *</b> | 1.43 *  | 1.55 *        | <b>3.51 *</b>  | 2.85 **        |
| mnhC      | Na-H antiporter component                                             | 1.44 *  | 1.52 *        | <b>3.64 *</b>  | 2.28 *         | 1.86 *        | 2.12 *        | 2.02 ** | 1.83 **       | 2.42 **        | 2.19 **        |
| sepA      | Antiseptic resistance protein SepA                                    | 1.23 ** | 1.43 *        | 2.55 **        | 2.79 **        | 1.86 **       | 1.71 **       | 2.01 ** | 2.44 *        | 2.56 **        | 2.19 **        |
| NWMN_2407 | hypothetical protein                                                  | 1.17 *  | 1.51 *        | 2.06 *         | 1.73 **        | 0.98 *        | 1.34 *        | 1.11 *  | 1.34 *        | 2.76 **        | 1.85 **        |
| NWMN_0037 | similar to LysR family regulatory protein                             | 1.26    | 0.94 †        | 2.52 *         | 2.41 *         | 2.03 *        | 2.42 *        | 1.42    | 2.13 *        | 1.41           | 2.60 *         |
| NWMN_2468 | acetyltransferase GNAT family protein                                 | 1.19    | 1.05          | 1.74 *         | 1.42           | 1.25          | 1.07 †        | 0.91 †  | 1.46          | 2.49 *         | 1.71 *         |
| sspA      | V8 protease glutamyl endopeptidase precursor                          | 1.14    | 1.90 *        | 1.81 *         | 1.40 *         | 1.52 *        | 1.25          | 0.96 †  | 2.47 *        | 1.53 *         | 1.60 *         |
| hysA      | hyaluronate lyase precursor                                           | 1.47 *  | 1.82 *        | 1.77 *         | 2.31 *         | 1.30 *        | 1.66 *        | 1.87 *  | 1.91 **       | 2.00 **        | 2.47 **        |
| NWMN_1397 | hypothetical protein                                                  | 1.71 *  | 1.11          | 2.46 *         | 2.20 *         | 1.31 *        | 1.42 *        | 1.35 *  | 2.13 *        | 2.05 **        | 1.70 *         |
| capO      | UDP-N-acetyl-D-mannosaminuronic acid dehydrogenase                    | 1.38 *  | 0.77 **       | 1.56 *         | 1.67 *         | 1.43 *        | 0.89 †        | 1.30    | 1.37 *        | 1.86 *         | 1.29           |
| NWMN_0704 | ABC transporter ATP-binding protein                                   | 1.74    | 1.60          | 0.91 †         | 1.58           | 1.30 †        | 0.85 †        | 1.08 †  | 1.20 †        | 1.84 *         | 1.32           |
| NWMN_0313 | phage amidase for bacteriophage phiNM4                                | 1.34 *  | 1.37 *        | 1.36 *         | 1.57 *         | 1.36 *        | 1.31 **       | 1.28 *  | 1.27 *        | 1.31 *         | 1.44 *         |
| NWMN_1769 | amidase for bacteriophage phiNM1                                      | 1.25    | 1.30          | 1.37           | 1.07 †         | 1.12 †        | 1.03 †        | 1.23 †  | 1.26          | 1.38           | 1.27           |

### NsaSR downregulated, WalkR regulated

|      |                      |         |               |                |                |                |               |               |                |               |               |
|------|----------------------|---------|---------------|----------------|----------------|----------------|---------------|---------------|----------------|---------------|---------------|
| spIC | serine protease SpIC | 1.48 *  | 2.57 *        | <b>12.13 *</b> | <b>3.01 **</b> | 2.05 **        | 2.44 *        | 2.71 **       | <b>4.23 **</b> | 2.36 **       | 2.42 *        |
| spIE | serine protease SpIE | 1.06 ** | <b>6.93 *</b> | <b>4.07 *</b>  | <b>4.91 *</b>  | <b>11.23 *</b> | 2.29 **       | 1.15 **       | <b>4.29 *</b>  | 1.64 **       | 2.30 **       |
| spID | serine protease SpID | 1.18 ** | <b>4.98 *</b> | 2.63 *         | 2.81 *         | 1.68 **        | <b>6.09 *</b> | <b>4.32 *</b> | <b>4.04 *</b>  | <b>7.37 *</b> | <b>3.24 *</b> |

|      |                                         |        |      |        |        |        |        |         |        |         |        |
|------|-----------------------------------------|--------|------|--------|--------|--------|--------|---------|--------|---------|--------|
| fnbA | fibronectin binding protein A precursor | 1.40   | 0.78 | 2.01 * | 2.33 * | 4.76 * | 2.00 * | 2.04 ** | 1.44   | 2.08 ** | 1.68 * |
| splA | serine protease SplA                    | 1.89 * | 1.44 | 1.25 † | 1.76 * | 1.22   | 0.95 † | 1.86 *  | 2.01 * | 1.42    | 1.37 † |
| hly  | truncated beta-hemolysin                | 1.22   | 1.29 | 1.58 * | 1.18   | 1.37 * | 1.56 * | 1.70 *  | 1.28   | 1.53 *  | 1.13   |

---

12 **Supp. Table 3: WalkR regulated genes.** The maximal upregulation at any time point for each given condition is reported. Genes  
 13 with maximal regulation >3 fold are highlighted in bold red font. Fold changes with significance  $p < 0.05$  are marked with asterisks  
 14 (\*) by Z-factor test and crosses (+) by T-test. Genes are arranged by decreasing maximal upregulation in any of the conditions.

| Gene      | WalkR regulated<br>Gene description                      | Control<br>[μ/mL] | PMX30063      |                |                 | Daptomycin     |                 |                 | LL16          |                |                |
|-----------|----------------------------------------------------------|-------------------|---------------|----------------|-----------------|----------------|-----------------|-----------------|---------------|----------------|----------------|
|           |                                                          |                   | 0.39          | 0.78           | 1.17            | 2.0            | 4.0             | 6.0             | 2.0           | 4.0            | 6.0            |
| hrcA      | heat-inducible transcription repressor                   | 1.27 **           | 1.17 **       | <b>3.19 **</b> | <b>23.52 *</b>  | <b>4.40 **</b> | <b>16.07 **</b> | <b>19.77 **</b> | 2.91 **       | 2.44 **        | 1.73 **        |
| NWMN_0485 | UvrB-UvrC motif domain protein                           | 1.41 **           | <b>3.24 *</b> | <b>4.16 **</b> | <b>19.86 **</b> | <b>7.30 **</b> | <b>11.44 **</b> | <b>16.9 **</b>  | 2.05 **       | 2.11 **        | 2.74 **        |
| grpE      | Hsp-70 cofactor GrpE protein                             | 1.49 **           | 1.49 **       | <b>3.29 *</b>  | <b>5.17 **</b>  | 2.29 **        | <b>5.00 **</b>  | <b>7.97 **</b>  | 1.20 *        | 1.12 **        | 1.44 *         |
| NWMN_1750 | extracellular glutamine-binding protein                  | 1.62 *            | <b>3.69 *</b> | <b>3.61 **</b> | <b>7.32 **</b>  | <b>3.98 *</b>  | 2.56 *          | 0.94            | 2.04 *        | <b>3.35 *</b>  | <b>3.85 **</b> |
| pflA      | similar to formate-lyase activating enzyme               | 1.32              | 1.44          | <b>4.67 *</b>  | <b>5.81 *</b>   | 2.16 *         | 1.22            | 1.57            | <b>6.41 *</b> | 2.36 *         | 1.53           |
| prmA      | ribosomal protein L11 methylase                          | 1.30 **           | 1.65 **       | 2.79 **        | <b>6.37 **</b>  | 1.97 **        | <b>4.03 **</b>  | <b>3.54 **</b>  | 1.52 **       | 1.69 **        | 1.63 **        |
| lytM      | peptidoglycan hydrolase                                  | 1.24 **           | 1.57 **       | 1.96 **        | <b>3.18 **</b>  | 2.66 **        | 1.81 **         | 2.58 **         | 2.73 **       | <b>6.36 **</b> | 2.85 **        |
| pyrB      | aspartate carbamoyltransferase catalytic subunit         | 1.51              | 2.85 *        | 1.31           | 1.07            | 1.92 *         | <b>6.02 *</b>   | <b>4.56 *</b>   | 1.65 *        | 1.83 *         | 1.39           |
| NWMN_1687 | hypothetical protein                                     | 1.81              | 2.18 *        | <b>3.49 *</b>  | <b>4.03 *</b>   | <b>5.93 *</b>  | 2.31 *          | 1.15            | 2.30 *        | 2.67 *         | <b>4.28 *</b>  |
| NWMN_1347 | amino acid permease                                      | 1.94              | 1.36          | 1.42           | 1.31            | 1.03           | 0.93            | 1.21            | <b>5.72 *</b> | 2.45           | 1.73           |
| NWMN_0921 | ATL autolysin transcriptional regulator                  | 1.20 *            | 1.68 *        | <b>5.45 *</b>  | 1.57 *          | 2.19 *         | <b>3.32 *</b>   | <b>3.07 *</b>   | 2.12 **       | 2.80 **        | 1.52 *         |
| NWMN_0122 | hypothetical protein                                     | 1.36              | <b>3.25 *</b> | 2.88 *         | <b>3.55 *</b>   | 2.29 *         | 2.30 **         | 1.64 *          | 1.19          | <b>5.44 *</b>  | <b>3.45 *</b>  |
| dnaJ      | heat shock protein 40                                    | 1.24 **           | 1.23 **       | <b>3.16 **</b> | <b>5.43 **</b>  | 1.84 **        | <b>3.22 **</b>  | <b>3.97 **</b>  | 1.67 **       | 1.83 **        | 1.71 **        |
| NWMN_0402 | hypothetical protein                                     | 1.51 *            | 1.40 *        | 2.68 *         | <b>4.79 **</b>  | 2.45 *         | 2.92 **         | <b>4.79 **</b>  | 1.27 *        | 2.70 **        | <b>3.26 **</b> |
| pyrC      | dihydroorotase multifunctional complex type              | 1.83              | 2.06 *        | 1.16           | 0.72 †          | 1.91 *         | <b>4.16 *</b>   | <b>4.67 *</b>   | 1.89          | 1.67           | 1.78           |
| NWMN_0757 | secreted von Willebrand factor-binding protein precursor | 1.19              | 0.81 †        | 1.32 †         | 1.90            | <b>4.52 *</b>  | 1.36            | 1.14 †          | 1.2 †         | 1.36           | 1.05 †         |
| NWMN_2443 | secretory antigen SsaA homolog                           | 1.54 *            | 2.14 **       | 1.80 **        | 2.18 **         | 2.98 **        | 1.98 *          | 1.43 *          | 2.46 *        | <b>4.35 *</b>  | 2.08 *         |
| pyrAA     | carbamoyl-phosphate synthase small chain                 | 1.89              | 2.02 *        | 0.97           | 0.66 †          | 2.52 *         | <b>3.93 *</b>   | <b>4.22 *</b>   | 1.95          | 1.89           | 1.78           |
| NWMN_0423 | sodium-dependent symporter protein                       | 1.55 *            | 2.03 *        | 2.58 *         | <b>4.13 *</b>   | 2.83 *         | 2.37 *          | 1.34            | 1.85 *        | 2.83 *         | 1.54 *         |
| NWMN_1071 | hypothetical protein                                     | 1.56 *            | 2.25 *        | 2.96 **        | 2.28 *          | <b>3.58 **</b> | <b>4.12 *</b>   | 2.83 *          | 1.59 **       | 2.47 **        | <b>3.21 **</b> |
| NWMN_0431 | MutT domain containing protein                           | 1.11 **           | <b>3.67 *</b> | 2.17 *         | 1.87 **         | 1.80 **        | 1.55 **         | 1.67 **         | 2.20 **       | 2.67 **        | 2.63 *         |

|           |                                                            |         |               |         |                |               |               |               |               |                |                |
|-----------|------------------------------------------------------------|---------|---------------|---------|----------------|---------------|---------------|---------------|---------------|----------------|----------------|
| NWMN_0634 | secretory antigen SsaA-like protein                        | 1.43 *  | 1.28 *        | 1.85 ** | 2.55 *         | 1.80 **       | 1.33 *        | 1.40 *        | 2.51 *        | <b>3.53 *</b>  | 1.72 **        |
| pryF      | orotidine 27-phosphate decarboxylase                       | 1.73 *  | 1.83 *        | 0.84 †  | 0.76 †         | 1.92 *        | <b>3.18 *</b> | 2.95 *        | <b>3.38 *</b> | 1.39           | 1.32           |
| pyrE      | orotate phosphoribosyltransferase                          | 1.78 *  | 1.24          | 1.45    | 0.91 †         | 1.61 *        | 2.76 *        | 2.08 *        | <b>3.37 *</b> | 2.31 *         | 1.57 *         |
| lukS      | leukocidin hemolysin toxin family S subunit                | 1.48 *  | 1.51 *        | 2.41 *  | 2.27 *         | 1.81 *        | 2.85 *        | <b>3.36 *</b> | 2.58 *        | <b>3.23 *</b>  | 1.87 *         |
| NWMN_1708 | hypothetical protein                                       | 1.59    | 1.10 †        | 1.88    | 1.53           | 2.33 *        | 1.51 †        | 0.70 †        | 1.75          | <b>3.34 *</b>  | 1.42           |
| NWMN_0049 | similar to Na Pi-cotransporter                             | 1.34 *  | 1.96 *        | 1.51 ** | 2.44 **        | 1.84 **       | 1.70 *        | 1.37 *        | 2.30 *        | <b>3.22 **</b> | 1.94 **        |
| NWMN_2090 | similar to Zinc-type alcohol dehydrogenase protein         | 1.51 *  | <b>3.21 *</b> | 1.60 *  | 2.41 **        | 1.48 *        | 1.99 *        | 2.58 **       | 1.51 *        | 1.72 *         | 1.31 *         |
| NWMN_0326 | MarR family regulatory protein                             | 1.31 ** | 1.67 *        | 1.95 ** | 2.83 **        | 1.98 *        | 1.87 *        | 1.08 *        | 1.47 **       | 2.11 **        | <b>3.10 **</b> |
| fmtB      | methicillin resistance determinant FmtB protein            | 1.15 ** | 1.13 *        | 1.80 *  | <b>3.01 **</b> | 1.69 **       | 2.28 **       | <b>3.08 *</b> | 1.77 **       | 2.13 **        | 2.76 **        |
| NWMN_0724 | similar to a protein with LysM domain                      | 1.46    | 1.60 *        | 1.84 *  | 2.65 *         | <b>3.01 *</b> | 1.56          | 2.92 *        | 2.00 *        | 2.24 **        | 1.61 *         |
| NWMN_0165 | hypothetical protein                                       | 1.75 *  | 1.35 *        | 2.74 *  | 2.23 *         | 2.73 *        | 2.82 *        | 2.59 **       | 1.84 *        | 2.16 *         | 2.89 *         |
| NWMN_1667 | mannosyl-glycoprotein endo-beta-N-acetylglucosamidase      | 1.32 *  | 2.20 *        | 1.48 *  | 1.60 *         | 1.33 *        | 1.41 *        | 1.15          | 1.19          | 2.88 *         | 1.35 *         |
| NWMN_0665 | hypothetical protein                                       | 1.75    | 1.17 †        | 1.66    | 2.86 *         | 2.56 *        | 1.10          | 0.96 †        | 1.41          | 2.06 *         | 1.14 †         |
| lukF      | leukocidin hemolysin toxin family F subunit                | 1.54 *  | 2.23 *        | 1.63 *  | 2.02 *         | 1.31          | 2.82 *        | 2.11 *        | 2.65 *        | 2.28 *         | 1.59 *         |
| clpB      | similar to lipopolysaccharide modification acyltransferase | 1.14    | 1.54 *        | 1.49 *  | 2.70 *         | 1.75 *        | 1.94 *        | 0.99          | 1.81 *        | 2.09 *         | 1.48 *         |
| NWMN_0362 | hypothetical protein                                       | 1.46    | 1.28          | 1.04    | 1.33           | 1.81 *        | 1.99 *        | 2.63 *        | 1.22          | 1.08           | 1.35           |
| NWMN_1159 | similar to DNA processing protein DprA                     | 1.19 ** | 2.14 *        | 1.93 *  | 1.82 **        | 1.76 *        | 2.43 *        | 1.67 *        | 1.73 *        | 2.63 **        | 1.82 *         |
| NWMN_1068 | hypothetical protein                                       | 1.33 *  | 1.00 †        | 1.53 *  | 1.17           | 1.31 *        | 2.61 *        | 1.98 *        | 0.91 †        | 1.08 †         | 0.97 †         |
| potA      | spermidine putrescine ABC transporter ATP-binding protein  | 1.50 *  | 1.26 *        | 1.68 *  | 1.81 *         | 1.55 *        | 2.22 *        | 1.82 *        | 2.16 *        | 2.48 **        | 1.57 *         |
| NWMN_0489 | N-terminal deoxyribonuclease                               | 1.31 ** | 2.47 *        | 1.54 *  | 2.14 **        | 1.93 *        | 1.72 *        | 1.26 *        | 1.60 *        | 2.29 **        | 1.95 **        |
| NWMN_0157 | hypothetical protein                                       | 1.57 *  | 1.28          | 1.07 †  | 1.15           | 2.45 *        | 2.17 *        | 1.81 *        | 1.82 *        | 1.58 *         | 1.12           |
| radA      | DNA repair protein RadA                                    | 1.27 ** | 2.00 **       | 1.69 ** | 2.39 **        | 1.51 **       | 1.70 *        | 1.17 **       | 1.77 **       | 1.92 **        | 2.06 **        |
| ssl11     | staphylococcal enterotoxin-like toxin                      | 1.34 †  | 1.1 †         | 0.95 ** | 0.87 **        | 2.32 *        | 1.14 †        | 0.71 **       | 0.95 **       | 1.04 †         | 1.05 †         |
| NWMN_1518 | hypothetical protein                                       | 1.19 *  | 1.32 *        | 1.53 ** | 2.31 **        | 1.02 **       | 1.73 *        | 1.40 **       | 1.87 *        | 1.84 **        | 2.00 *         |
| NWMN_0432 | similar to acetyltransferase GNAT family protein           | 1.37    | 1.85 *        | 1.90 *  | 2.29 *         | 1.32          | 1.88 *        | 1.84 *        | 1.48          | 1.39           | 2.13 *         |
| sle1      | N-acetylmuramoyl-L-alanine amidase aaa precursor           | 1.27    | 1.65          | 1.83 *  | 2.22 *         | 1.13 †        | 0.97 †        | 0.93 †        | 1.42          | 2.19 *         | 1.50           |

|             |                                                   |         |        |         |         |        |        |        |         |         |         |
|-------------|---------------------------------------------------|---------|--------|---------|---------|--------|--------|--------|---------|---------|---------|
| NWMN_2236   | abortive infection protein family protein         | 1.22 *  | 1.48 * | 1.59 *  | 1.90 ** | 2.10 * | 1.60 * | 1.41 * | 1.55 *  | 2.17 *  | 1.50 *  |
| NWMN_1751   | phosphotransferase system EIIC                    | 1.33 *  | 1.98 * | 1.55 *  | 1.38 *  | 1.21   | 1.17   | 1.15   | 1.40 *  | 2.16 *  | 0.97 †  |
| NWMN_0123   | similar to surfactin synthetase                   | 1.12 ** | 1.28 * | 1.66 ** | 2.11 ** | 1.06 * | 1.47 * | 1.23 * | 1.33 ** | 1.71 ** | 2.01 ** |
| NWMN_0964   | similar to transcriptional regulator              | 1.48 *  | 0.98 † | 1.22    | 1.32 *  | 1.85 * | 1.45 * | 1.61 * | 1.95 *  | 2.05 *  | 1.82 *  |
| NWMN_1066   | similar to fibrinogen-binding protein             | 1.41    | 1.10   | 1.48    | 1.65 *  | 1.29   | 1.34   | 1.26   | 1.20    | 1.34    | 1.17    |
| geh         | truncated triacylglycerol lipase precursor        | 1.21    | 1.39 † | 1.03 †  | 0.63 ** | 0.90 † | 1.56 † | 1.38 † | 1.51    | 1.01 †  | 0.97 †  |
| vicR (walR) | response regulator protein                        | 1.21 *  | 1.32 * | 1.54 *  | 1.36 *  | 1.17 * | 1.09   | 1.25 * | 1.23 *  | 1.26 *  | 1.52 *  |
| secDF       | preprotein translocase component SecDF            | 1.32 *  | 1.26 * | 1.11    | 1.20 *  | 1.11   | 1.18   | 1.02 † | 1.23 *  | 1.54 *  | 1.17    |
| flr         | formyl peptide receptor-like 1 inhibitory protein | 1.36    | 0.92 † | 0.76 †  | 1.45 †  | 0.87 † | 1.47 † | 0.95 † | 1.37 †  | 0.61 ** | 0.94 †  |

### WalkR/ SaeSR regulated

|           |                                         |        |               |                |                |               |               |               |                |               |               |
|-----------|-----------------------------------------|--------|---------------|----------------|----------------|---------------|---------------|---------------|----------------|---------------|---------------|
| spIF      | serine protease SpIF                    | 1.85 * | 1.12          | <b>7.57 *</b>  | 1.44 *         | 1.09          | <b>7.69 *</b> | <b>5.48 *</b> | <b>3.23 *</b>  | <b>3.23 *</b> | <b>12.9 *</b> |
| hlgA      | gamma-hemolysin component A             | 1.71 * | 1.43          | <b>4.99 *</b>  | <b>12.03 *</b> | <b>4.17 *</b> | <b>5.82 *</b> | <b>8.04 *</b> | <b>4.07 *</b>  | <b>6.12 *</b> | <b>6.17 *</b> |
| hlgC      | gamma-hemolysin component C             | 1.48   | 2.29 *        | <b>3.38 *</b>  | <b>6.52 *</b>  | <b>3.27 *</b> | <b>4.01 *</b> | <b>3.81 *</b> | 1.93 *         | 2.24 *        | 2.17 *        |
| hlgB      | gamma hemolysin component B             | 1.67   | 1.90          | <b>3.40 *</b>  | <b>4.95 *</b>  | <b>3.11 *</b> | <b>4.11 *</b> | <b>5.61 *</b> | 1.99           | 1.80          | 2.54 *        |
| spIB      | serine protease SpIB                    | 1.58 * | <b>3.32 *</b> | <b>4.25 **</b> | 2.47 *         | 1.43 *        | 2.48 *        | 2.67 *        | <b>3.34 **</b> | 1.4 **        | <b>5.34 *</b> |
| fnbB      | fibronectin binding protein B precursor | 1.30   | 0.90          | 2.13 *         | 2.01 *         | <b>3.52 *</b> | 2.65 *        | 2.49 **       | 2.01 *         | 2.28 **       | 1.62 *        |
| coa       | coagulase precursor                     | 1.13   | 1.12          | 1.23           | 1.58           | <b>3.24 *</b> | 2.04 *        | 1.70          | 1.23           | 1.95 *        | 1.41          |
| NWMN_0677 | hypothetical protein                    | 1.47 * | 1.20          | 1.20           | 2.58 *         | 1.96 *        | 2.22 *        | 2.56 *        | 1.27 *         | 1.68 *        | 1.61 *        |
| chp       | chemotaxis-inhibiting protein CHIPS     | 1.35 † | 2.17 *        | 1.20 †         | 0.71 **        | 0.66 **       | 1.09 **       | 1.04 **       | 2.57 *         | 0.93 **       | 1.18 †        |
| hla       | alpha-hemolysin precursor               | 1.22   | 1.43          | 1.76           | 1.95           | 2.06          | 1.22          | 1.25          | 1.66           | 1.16          | 1.15          |
| sbi       | immunoglobulin G-binding protein Sbi    | 1.25   | 1.24          | 1.70 *         | 1.13           | 1.23          | 1.81 *        | 1.94 *        | 1.30           | 1.65 *        | 1.53 *        |
| saeR      | DNA-binding response regulator SaeR     | 1.40 * | 1.03          | 1.68 *         | 1.78 *         | 1.37 *        | 1.64 *        | 1.46 *        | 1.65 *         | 1.54 **       | 1.56 **       |
| saeS      | sensor histidine kinase SaeS            | 1.27 * | 1.10 *        | 1.53 *         | 1.5 *          | 1.25 *        | 1.63 *        | 1.34 *        | 1.43 *         | 1.56 *        | 1.40 *        |
| NWMN_0676 | hypothetical protein                    | 1.32 * | 1.44 *        | 1.58 *         | 1.51 *         | 1.52 *        | 1.51 *        | 1.28 *        | 1.24 *         | 1.47 *        | 1.58 **       |
| efb (fib) | similar to fibrinogen-binding protein   | 1.20   | 1.00 †        | 1.23           | 1.42 *         | 1.39 *        | 1.51 *        | 1.37 *        | 1.22           | 1.33 *        | 1.23          |

---

|     |                                          |      |      |        |        |        |        |        |      |      |      |
|-----|------------------------------------------|------|------|--------|--------|--------|--------|--------|------|------|------|
| scn | staphylococcal complement inhibitor SCIN | 1.43 | 1.46 | 0.89 * | 1.09 * | 1.30 * | 1.05 * | 0.92 * | 1.18 | 1.38 | 1.15 |
|-----|------------------------------------------|------|------|--------|--------|--------|--------|--------|------|------|------|



16 **Supp. Table 4:** Oligonucleotides used for this study.

| # | Primer        | Description                                            | Sequence                                                                     |
|---|---------------|--------------------------------------------------------|------------------------------------------------------------------------------|
| 1 | 3Sol_N        | Random hexamer (N) + adapter for RNAseq cDNA synthesis | 5'- GCTCTCCGATCTNNNNNN - 3'                                                  |
| 2 | 3Sol          | amplification of RNAseq cDNA library                   | 5' - GCTCTCCGATCT - 3'                                                       |
| 3 | SolM1         | generation of Illumina library                         | 5' - AATGATACGGGCGACCACCGAGATCTACACTCTTTCCTACACGACGCTCTCCGATCT - 3'          |
| 4 | SolM2         | barcoding of Illumina library (barcode nucleotide 'X') | 5' - CAAGCAGAAGACGGCATAACGAGATXXXXXXXXGTGACTGGAGTTCAGACGTGTGCTCTCCGATCT - 3' |
| 5 | 5SolM1_1<br>8 | Hot-start primer for amplification of Illumina library | 5' - AATGATACGGGCGACCACC - 3'                                                |
| 6 | 5SolM2_1<br>9 | Hot-start primer for amplification of Illumina library | 5' - CAAGCAGAAGACGGCATAAC - 3'                                               |

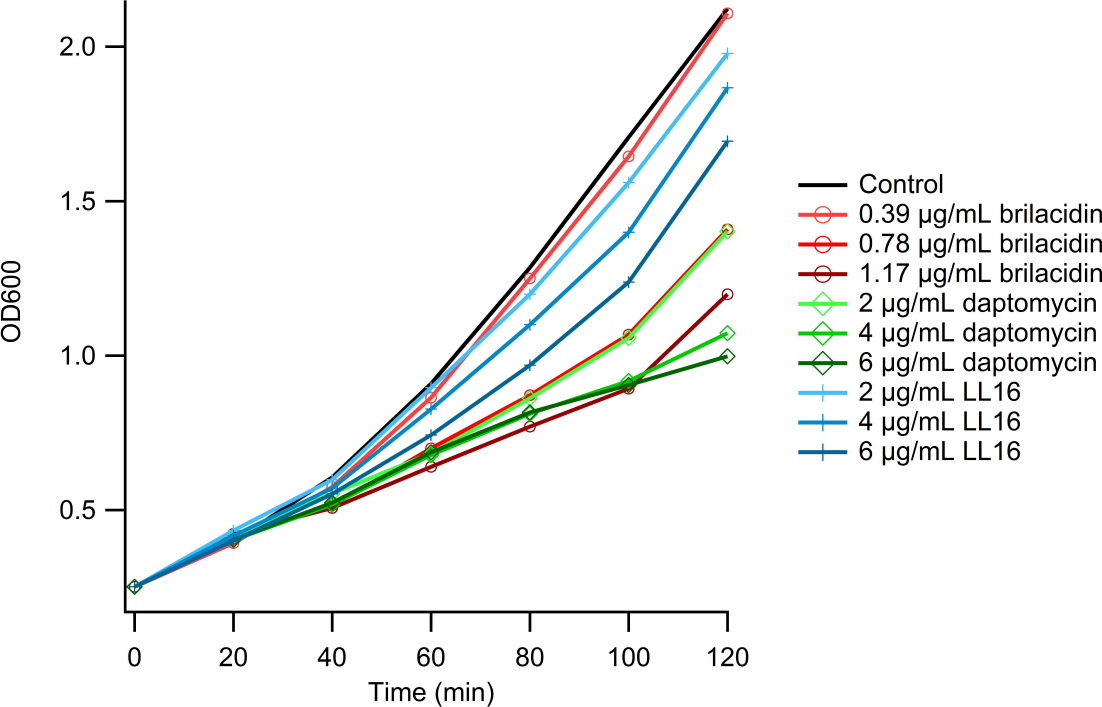

Supplement: AAC.02955-14_zac009143181so1.pdf [file AAC.02955-14_zac009143181so1.pdf]
